# Supplementary material for: Lectin inspired polymers based on the dipeptide Ser-Asp for glycopeptide enrichment
Source: Royal Society of Chemistry journal article supplement (doi:10.1039/c8an01258j), 2018-01-01
Supplement: c8an01258j2.xlsx [file c8an01258j2.xlsx]

## Sheet: Sheet1
		Table S1 The detailed information of the identified glycosylation sites from HeLa cell lysate
Proteins	Positions within proteins	Localization prob	Score diff	Number of Deamidation (N)	Amino acid	Sequence window	Score	Score for localization	Modified sequence	Position in peptide	Charge	m/z	Mass error [ppm]
>sp|P01033|TIMP1_HUMAN Metalloproteinase inhibitor 1 OS=Homo sapiens GN=TIMP1 PE=1 SV=1	53	1	213.182	1	N	SDIVIRAKFVGTPEVNQTTIYQRYEIKMTKM	86.488	213.18	_N(de)ATVVWM(ox)K_	8	3	585.297	0.20049
>sp|P10253|LYAG_HUMAN Lysosomal alpha-glucosidase OS=Homo sapiens GN=GAA PE=1 SV=4	470	1	210.372	1	N	YRPYDEGIRRGVFITNETGQPIIGKVWPGST	117.93	210.37	_TPITAN(de)ITK_	6	2	787.925	0.50429
>sp|P23284|PPIB_HUMAN Peptidyl-prolyl cis-trans isomerase B OS=Homo sapiens GN=PPIB PE=1 SV=2	148	1	205.298	1	N	YGPGWVSMANAGKDTNGSQFFITTVKTAWID	138.89	205.3	_FTFTSHTPGDHQICIHSN(de)STR_	3	2	729.859	0.53625
>sp|Q9NX62|IMPA3_HUMAN Inositol monophosphatase 3 OS=Homo sapiens GN=IMPAD1 PE=1 SV=1	259	1	203.705	1	N	SHSGMVKQVAIQTFGNQTTIIPAGGAGYKVI	278.84	203.71	_MVIWN(de)DSVVR_	9	2	1118.58	0.36804
>sp|Q96NT5|PCFT_HUMAN Proton-coupled folate transporter OS=Homo sapiens GN=SLC46A1 PE=1 SV=1;>sp|Q96NT5-2|PCFT_HUMAN Isoform 2 of Proton-coupled folate transporter OS=Homo sapiens GN=SLC46A1	58;58	1	203.515	1	N	TTQYIWHRFSADIGYNGTRQRGGCSNRSADP	228.78	203.51	_CN(de)QTTGQCECRPGYQGIHCETCK_	8	2	601.278	0.075349
>sp|Q8NFT8|DNER_HUMAN Delta and Notch-like epidermal growth factor-related receptor OS=Homo sapiens GN=DNER PE=1 SV=1	223	1	196.11	1	N	NSSAGGRIVSFEVPQNTSVKIRQDATASIII	211.51	196.11	_DITDIIN(de)NTFIR_	9	2	724.885	0.28647
>sp|P05090|APOD_HUMAN Apolipoprotein D OS=Homo sapiens GN=APOD PE=1 SV=1	65	1	194.124	1	N	EKIPTTFENGRCIQANYSIMENGKIKVINQE	96.544	194.12	_EIIIN(de)TSEVTVR_	5	3	596.283	-0.13138
>sp|P11166|GTR1_HUMAN Solute carrier family 2, facilitated glucose transporter member 1 OS=Homo sapiens GN=SLC2A1 PE=1 SV=2	45	1	190.365	1	N	TGVINAPQKVIEEFYNQTWVHRYGESIIPTT	122.97	190.37	_VTCKNGQGNCYKSN(de)SSMHITDCR_	7	2	861.418	-0.10007
>sp|P23284|PPIB_HUMAN Peptidyl-prolyl cis-trans isomerase B OS=Homo sapiens GN=PPIB PE=1 SV=2	148	1	189.093	1	N	YGPGWVSMANAGKDTNGSQFFITTVKTAWID	138.87	189.09	_CISKEN(de)ATTDIITK_	3	2	729.859	0.77112
>sp|P05090|APOD_HUMAN Apolipoprotein D OS=Homo sapiens GN=APOD PE=1 SV=1	98	1	186.418	1	N	DVEKINAAKAIPQPQNVTSIIGCTH______	92.633	186.42	_IQN(de)NISYQMADIHHIK_	7	2	868.935	0.44759
>sp|P01033|TIMP1_HUMAN Metalloproteinase inhibitor 1 OS=Homo sapiens GN=TIMP1 PE=1 SV=1	53	1	186.155	1	N	IWNYAPSGIDIFTKENITAPGSDSAVFFEQG	83.204	186.15	_EIGDN(de)VSMIIVPFK_	2	2	1064.5	-0.3543
>sp|P26006-1|ITA3_HUMAN Isoform 2 of Integrin alpha-3 OS=Homo sapiens GN=ITGA3;>sp|P26006|ITA3_HUMAN Integrin alpha-3 OS=Homo sapiens GN=ITGA3 PE=1 SV=5	265;265	1	183.335	1	N	IGYTMQVGSFIIHPKNITIVTGAPRHRHMGA	144.57	183.33	_WNRGN(de)ESIPER_	1	2	521.798	0.45672
>sp|Q99538|LGMN_HUMAN Legumain OS=Homo sapiens GN=LGMN PE=1 SV=1	167	1	176.801	1	N	GIIVFPNEDIHVKDINETIHYMYKHKMYRKM	217.91	176.8	_DFN(de)ETQIAR_	3	2	714.329	-0.089383
>sp|O15031|PLXB2_HUMAN Plexin-B2 OS=Homo sapiens GN=PLXNB2 PE=1 SV=3	127	1	169.087	1	N	CGSIFKGICAIRAISNISIRIFYEDGSGEKS	71.148	169.09	_MSVINFECN(de)KTAGNDGK_	4	2	437.753	-0.17118
>sp|P08962|CD63_HUMAN CD63 antigen OS=Homo sapiens GN=CD63 PE=1 SV=2;>sp|P08962-2|CD63_HUMAN Isoform 2 of CD63 antigen OS=Homo sapiens GN=CD63;>sp|P08962-3|CD63_HUMAN Isoform 3 of CD63 antigen OS=Homo sapiens GN=CD63	150;127;68	1	167.614	1	N	IIDRMQADFKCCGAANYTDWEKIPSMSKNRV	112.5	167.61	_YWCKWN(de)NTGCQAIPSQDEGPSK_	6	3	706.969	-0.37823
>sp|P11166|GTR1_HUMAN Solute carrier family 2, facilitated glucose transporter member 1 OS=Homo sapiens GN=SLC2A1 PE=1 SV=2	45	1	164.528	1	N	TGVINAPQKVIEEFYNQTWVHRYGESIIPTT	122.52	164.53	_TFYWDFYTN(de)R_	7	2	861.418	-0.12417
>sp|P19652|A1AG2_HUMAN Alpha-1-acid glycoprotein 2 OS=Homo sapiens GN=ORM2 PE=1 SV=2	93	1	161.946	1	N	IFIREYQTRQNQCFYNSSYINVQRENGTVSR	139.49	225.13	_QEDQIQDYRKN(de)NTYIVK_	7	3	641.616	0.44149
>sp|P13612|ITA4_HUMAN Integrin alpha-4 OS=Homo sapiens GN=ITGA4 PE=1 SV=3	480	1	161.857	1	N	PVVIVDASISHPESVNRTKFDCVENGWPSVC	125.67	161.86	_KNDEN(de)ITIETVCHDPK_	18	3	693.039	-0.24933
>sp|P08648|ITA5_HUMAN Integrin alpha-5 OS=Homo sapiens GN=ITGA5 PE=1 SV=2	182	1	159.265	1	N	EPISDPVGTCYISTDNFTRIIEYAPCRSDFS	114.86	159.26	_TCPAGVM(ox)GEN(de)NTIVWK_	19	3	844.392	-1.0552
>sp|Q08380|LG3BP_HUMAN Galectin-3-binding protein OS=Homo sapiens GN=LGALS3BP PE=1 SV=1	69	1	158.041	1	N	DITDASVVCRAIGFENATQAIGRAAFGQGSG	175.74	158.04	_VSDN(de)ESSSN(de)YTYK_	6	3	450.233	-0.23655
>sp|P11279|LAMP1_HUMAN Lysosome-associated membrane glycoprotein 1 OS=Homo sapiens GN=LAMP1 PE=1 SV=3	84	1	157.577	1	N	SDATVVINRSSCGKENTSDPSIVIAFGRGHT	124.2	157.58	_VASVININPN(de)TTHSTGSCR_	7	3	675.99	-0.91286
>sp|Q07954|LRP1_HUMAN Prolow-density lipoprotein receptor-related protein 1 OS=Homo sapiens GN=LRP1 PE=1 SV=2	3333	1	157.384	1	N	PTNFYIGSDGRTCVSNCTASQFVCKNDKCIP	172.76	157.38	_GKAN(de)STGTIVITDPTR_	5	2	831.85	0.26874
>sp|P19652|A1AG2_HUMAN Alpha-1-acid glycoprotein 2 OS=Homo sapiens GN=ORM2 PE=1 SV=2	98	1	157.384	1	N	IHRIVPRIRDVFGWGNITCPICKGIFTAINI	135.71	157.38	_IEN(de)IQSPSEQK_	7	2	834.381	0.12233
>sp|Q8NCC3|PAG15_HUMAN Group XV phospholipase A2 OS=Homo sapiens GN=PLA2G15 PE=1 SV=2	289	1	156.362	1	N	YTWSPEKVFVQTPTINYTIRDYRKFFQDIGF	211.12	156.36	_WSFSN(de)GTSWR_	9	2	776.922	-0.5173
>sp|Q02809|PLOD1_HUMAN Procollagen-lysine,2-oxoglutarate 5-dioxygenase 1 OS=Homo sapiens GN=PLOD1 PE=1 SV=2	197	1	154.15	1	N	FYTKIFIDPEKREQINITIDHRCRIFQNIDG	168.64	154.15	_AAIPSAIDTN(de)SSK_	4	2	620.32	0.88929
>sp|Q9UBG0|MRC2_HUMAN C-type mannose receptor 2 OS=Homo sapiens GN=MRC2 PE=1 SV=2	69	1	153.946	1	N	CIEAQGGQVRVTPACNTSIPAQRWKWVSRNR	317	153.95	_IVN(de)EITEFAK_	6	3	472.57	-0.78709
>sp|O15031|PLXB2_HUMAN Plexin-B2 OS=Homo sapiens GN=PLXNB2 PE=1 SV=3	127	1	153.245	1	N	CGSIFKGICAIRAISNISIRIFYEDGSGEKS	71.08	153.24	_CVYEAICN(de)TTSECPPPVITR_	4	2	437.753	-0.086839
>sp|Q08380|LG3BP_HUMAN Galectin-3-binding protein OS=Homo sapiens GN=LGALS3BP PE=1 SV=1	398	1	151.556	1	N	FHTVPFQIIARYKGINITEDTYKPRIYTSPT	174.87	151.56	_DDAGN(de)YTCIASN(de)GPQGQIR_	5	2	849.938	0.14007
>sp|Q9NPC4|A4GAT_HUMAN Lactosylceramide 4-alpha-galactosyltransferase OS=Homo sapiens GN=A4GALT PE=2 SV=1	206	1	150.909	1	N	IFGRYKPDTIAVAVENGTGTDRQIIFIDIGT	240.92	150.91	_ESWGQESN(de)AGN(de)QTVVR_	12	2	954.471	0.32823
>sp|O75629|CREG1_HUMAN Protein CREG1 OS=Homo sapiens GN=CREG1 PE=1 SV=1	160	1	145.275	1	N	PICVHIMISGTVTKVNETEMDIAKHSIFIRH	78.272	145.28	_AATCINPIN(de)GSVCERPAN(de)HSAK_	2	2	583.766	0.08313
>sp|Q08380|LG3BP_HUMAN Galectin-3-binding protein OS=Homo sapiens GN=LGALS3BP PE=1 SV=1	580	1	144.183	1	N	HFNGFRTVIRPFYITNSSGVD__________	174.77	144.18	_IAFQN(de)M(ox)NGSEYFVK_	10	2	835.425	-0.24642
>sp|P00738|HPT_HUMAN Haptoglobin OS=Homo sapiens GN=HP PE=1 SV=1	241	1	143.925	1	N	GKKQIVEIEKVVIHPNYSQVDIGIIKIKQKV	84.874	143.93	_SHN(de)RSEEFIIAGK_	6	3	599.337	0.62663
>sp|P15586|GNS_HUMAN N-acetylglucosamine-6-sulfatase OS=Homo sapiens GN=GNS PE=1 SV=3	279	1	143.459	1	N	TNKHWIIRQAKTPMTNSSIQFIDNAFRKRWQ	132.31	143.46	_VNSDGGIVAIRN(de)ITAVGK_	5	3	615.289	-0.56067
>sp|Q8NHP8|PLBL2_HUMAN Putative phospholipase B-like 2 OS=Homo sapiens GN=PLBD2 PE=1 SV=2	88	1	143.309	1	N	IIMVDGRHPDAVAWANITNAIRETGWAFIEI	211.64	143.31	_DITDIINN(de)TFIR_	9	3	550.946	-0.64934
>sp|P56199|ITA1_HUMAN Integrin alpha-1 OS=Homo sapiens GN=ITGA1 PE=1 SV=2	532	1	141.954	1	N	GTEKEEQGKVYVYAINQTRFEYQMSIEPIKQ	162.26	141.95	_CTQQVCAGYCANN(de)STCTVNQGNQPQCR_	7	2	614.322	0.16744
>sp|Q5R3F8|PPR29_HUMAN Protein phosphatase 1 regulatory subunit 29 OS=Homo sapiens GN=ELFN2 PE=1 SV=1	117	1	140.78	1	N	QSSIQVIQIGYNKISNITEGMIRGMSRIQFI	194.23	140.78	_IYSDYIYFASSN(de)K_	3	2	567.795	0.3255
>sp|P02749|APOH_HUMAN Beta-2-glycoprotein 1 OS=Homo sapiens GN=APOH PE=1 SV=3	162	1	139.476	1	N	SDIVIRAKFVGTPEVNQTTIYQRYEIKMTKM	86.288	139.48	_EN(de)ISDPTSPIR_	8	3	585.297	0.37549
>sp|Q3T906|GNPTA_HUMAN N-acetylglucosamine-1-phosphotransferase subunits alpha/beta OS=Homo sapiens GN=GNPTAB PE=1 SV=1	1129	1	139.295	1	N	EIMGEEEIAFKMIRTNVSHVVGQIDDIRKNP	193.54	139.3	_IVSPEPGGAVGPN(de)ITCR_	2	3	518.602	0.04398
>sp|O75629|CREG1_HUMAN Protein CREG1 OS=Homo sapiens GN=CREG1 PE=1 SV=1	160	1	138.763	1	N	PICVHIMISGTVTKVNETEMDIAKHSIFIRH	77.42	138.76	_SYNGTTCEN(de)EIPFN(de)VTK_	2	2	583.766	-0.88094
>sp|O15031|PLXB2_HUMAN Plexin-B2 OS=Homo sapiens GN=PLXNB2 PE=1 SV=3	795	1	137.815	1	N	AWCGGQSRCVYEAICNTTSECPPPVITRIQP	70.942	137.81	_TGPVVEDSGSIIIEYVN(de)GSACTTSDGR_	8	3	790.025	-0.48919
>sp|P07711|CATL1_HUMAN Cathepsin L1 OS=Homo sapiens GN=CTSL PE=1 SV=2	221	1	137.787	1	N	ATEESCKYNPKYSVANDTGFVDIPKQEKAIM	104.82	137.79	_ITN(de)GSRYPN(de)CAYR_	5	2	956.47	-0.27379
>sp|O15031|PLXB2_HUMAN Plexin-B2 OS=Homo sapiens GN=PLXNB2 PE=1 SV=3	795	1	137.731	1	N	AWCGGQSRCVYEAICNTTSECPPPVITRIQP	70.334	137.73	_ISVAGRN(de)CSFQPER_	8	2	1184.53	-0.53762
>sp|Q9NRB3|CHSTC_HUMAN Carbohydrate sulfotransferase 12 OS=Homo sapiens GN=CHST12 PE=1 SV=2	134	1	137.625	1	N	RQQAERRSVIRGFCANSSIAFPTKERAFDDI	269.7	137.62	_ISM(ox)CQNIGYN(de)VTK_	5	2	700.829	-0.63433
>sp|P07339|CATD_HUMAN Cathepsin D OS=Homo sapiens GN=CTSD PE=1 SV=1	263	1	135.743	1	N	IAIGDQRINPTVTYGNDSFSAKASVSVTAED	99.044	211.75	_AN(de)TTQPGIVEGGQVIK_	9	3	538.926	-0.053705
>sp|Q12841|FSTL1_HUMAN Follistatin-related protein 1 OS=Homo sapiens GN=FSTL1 PE=1 SV=1	144	1	135.025	1	N	EAPKNPHCTSQEHKCNASSQFICSSGRCVAE	172.57	135.02	_DNIEACISGIHVDVGN(de)IK_	2	2	737.806	0.068768
>sp|P10253|LYAG_HUMAN Lysosomal alpha-glucosidase OS=Homo sapiens GN=GAA PE=1 SV=4	140	1	134.755	1	N	PWCFFPPSYPSYKIENISSSEMGYTATITRT	117.78	134.76	_VNDN(de)KTAAEEAIR_	3	3	625.3	-0.30886
>sp|P11047|LAMC1_HUMAN Laminin subunit gamma-1 OS=Homo sapiens GN=LAMC1 PE=1 SV=3	1223	1	134.42	1	N	STEAYNIIIRTIAGENQTAFEIEEINRKYEQ	119.87	212.92	_IIDNN(de)KTEKEIIDAFDK_	6	2	968.468	0.018377
>sp|P19652|A1AG2_HUMAN Alpha-1-acid glycoprotein 2 OS=Homo sapiens GN=ORM2 PE=1 SV=2	93	1	132.34	1	N	IFIREYQTRQNQCFYNSSYINVQRENGTVSR	139.3	188.48	_ICDEGHGIEVEIN(de)CTR_	7	3	641.616	-0.37132
>sp|P07711|CATL1_HUMAN Cathepsin L1 OS=Homo sapiens GN=CTSL PE=1 SV=2	221	1	132.081	1	N	ATEESCKYNPKYSVANDTGFVDIPKQEKAIM	104.55	132.08	_AAVPKN(de)VSVAEGK_	5	3	637.983	-0.62732
>sp|P08648|ITA5_HUMAN Integrin alpha-5 OS=Homo sapiens GN=ITGA5 PE=1 SV=2	182	1	132.015	1	N	EPISDPVGTCYISTDNFTRIIEYAPCRSDFS	114.56	132.01	_KIPAIN(de)QTITEANEK_	19	3	844.392	-1.1494
>sp|P00450|CERU_HUMAN Ceruloplasmin OS=Homo sapiens GN=CP PE=1 SV=1	397	1	130.359	1	N	IWNYAPSGIDIFTKENITAPGSDSAVFFEQG	79.393	130.36	_NIFIN(de)HSEN(de)ATAK_	2	2	1064.5	-0.23216
>sp|Q8N697|S15A4_HUMAN Solute carrier family 15 member 4 OS=Homo sapiens GN=SLC15A4 PE=2 SV=1	140	1	130.268	1	N	APATRAAICGSARIINCTAPGPDAAARCCSP	205.98	130.27	_AIVCSQPGIN(de)CTVK_	3	2	714.351	-0.2131
>sp|P26842|CD27_HUMAN CD27 antigen OS=Homo sapiens GN=CD27 PE=1 SV=2	95	1	130.259	1	N	HCESCRHCNSGIIVRNCTITANAECACRNGW	140.84	292.57	_WYSIGKVPGN(de)QTSTTIK_	1	2	771.311	-0.4034
>sp|P04216|THY1_HUMAN Thy-1 membrane glycoprotein OS=Homo sapiens GN=THY1 PE=1 SV=2	42	1	128.707	1	N	ACIVDQSIRIDCRHENTSSSPIQYEFSITRE	94.203	128.71	_IIKN(de)NESIDEGIR_	3	3	666.313	0.86852
>sp|Q86VZ4|LRP11_HUMAN Low-density lipoprotein receptor-related protein 11 OS=Homo sapiens GN=LRP11 PE=2 SV=2	291	1	128.675	1	N	FQITVTDTAGQRSSDNVSVTVIRAAYSTGGC	204.94	128.68	_DSIFIN(de)GYAPQN(de)ISIR_	4	2	589.307	-0.12837
>sp|Q02083|NAAA_HUMAN N-acylethanolamine-hydrolyzing acid amidase OS=Homo sapiens GN=NAAA PE=1 SV=3;>sp|Q02083-2|NAAA_HUMAN Isoform 2 of N-acylethanolamine-hydrolyzing acid amidase OS=Homo sapiens GN=NAAA;>sp|Q02083-3|NAAA_HUMAN Isoform 3 of N-acylethanolamine-hydrolyzing acid amidase OS=Homo sapiens GN=NAAA	37;37;37	1	128.313	1	N	GAGISAASPPAAPRFNVSIDSVPEIRWIPVI	168.64	128.31	_GN(de)ITFTAQYISYR_	2	2	688.856	0.14424
>sp|P06280|AGAL_HUMAN Alpha-galactosidase A OS=Homo sapiens GN=GLA PE=1 SV=1	139	1	128.035	1	N	VHSKGIKIGIYADVGNKTCAGFPGSFGYYDI	99.973	128.03	_N(de)IEKN(de)STKQEIIAAIEK_	9	2	525.777	-0.39669
>sp|P06280|AGAL_HUMAN Alpha-galactosidase A OS=Homo sapiens GN=GLA PE=1 SV=1	139	1	128.035	1	N	VHSKGIKIGIYADVGNKTCAGFPGSFGYYDI	99.941	128.03	_DTAVEGEEIEVN(de)CTAM(ox)ASKPATTIR_	9	2	525.777	-0.71659
>sp|Q13641|TPBG_HUMAN Trophoblast glycoprotein OS=Homo sapiens GN=TPBG PE=1 SV=1	275	1	127.57	1	N	IESIHIEDNAIKVIHNGTIAEIQGIPHIRVF	180.1	127.57	_SEASEGN(de)ITVTCR_	4	3	623.683	-0.39434
>sp|Q96QE2|MYCT_HUMAN Proton myo-inositol cotransporter OS=Homo sapiens GN=SLC2A13 PE=1 SV=3	433	1	125.975	1	N	VSPRITFKPIAPSGQNATCTRYSYCNECMID	229.75	125.98	_CQDGYYGFSKN(de)GCIPCQCNN(de)R_	12	3	621.652	-0.8815
>sp|Q99519|NEUR1_HUMAN Sialidase-1 OS=Homo sapiens GN=NEU1 PE=1 SV=1	352	1	125.747	1	N	HPEFRVNITIRWSFSNGTSWRKETVQIWPGP	230.96	125.75	_ASVSFINFN(de)ISNCER_	5	2	614.773	0.77632
>sp|Q6P4A8|PLBL1_HUMAN Phospholipase B-like 1 OS=Homo sapiens GN=PLBD1 PE=1 SV=2	411	1	125.612	1	N	GYWPSYNVPFHEKIYNWSGYPIIVQKIGIDY	197.47	125.61	_TCNPETFPSSN(de)ESR_	3	2	791.419	0.21186
>sp|P08603|CFAH_HUMAN Complement factor H OS=Homo sapiens GN=CFH PE=1 SV=4	911	1	125.527	1	N	KISYTCEGGFRISEENETTCYMGKWSSPPQC	112.02	125.53	_SKSN(de)SIIHTECISQVQR_	5	2	781.821	0.18761
>sp|P02786|TFR1_HUMAN Transferrin receptor protein 1 OS=Homo sapiens GN=TFRC PE=1 SV=2	251	1	123.023	1	N	NFGTKKDFEDIYTPVNGSIVIVRAGKITFAE	89.231	123.02	_N(de)VQFQTQSIR_	11	3	689.365	0.070735
>sp|P04216|THY1_HUMAN Thy-1 membrane glycoprotein OS=Homo sapiens GN=THY1 PE=1 SV=2	42	1	122.745	1	N	ACIVDQSIRIDCRHENTSSSPIQYEFSITRE	94.007	122.75	_CNN(de)GN(de)GTFECGVCR_	3	3	666.313	0.44247
>sp|P13612|ITA4_HUMAN Integrin alpha-4 OS=Homo sapiens GN=ITGA4 PE=1 SV=3	480	1	122.44	1	N	PVVIVDASISHPESVNRTKFDCVENGWPSVC	125.48	122.44	_N(de)ACCSTN(de)TSQEAHKDVSYIYR_	18	3	693.039	-0.046777
>sp|P11717|MPRI_HUMAN Cation-independent mannose-6-phosphate receptor OS=Homo sapiens GN=IGF2R PE=1 SV=3	112	1	121.787	1	N	GDSVIRSATRSIIEFNTTVSCDQQGTNHRVQ	126.69	121.79	_NACCSTN(de)TSQEAHKDVSYIYR_	6	3	736.999	-0.36836
>sp|P18084|ITB5_HUMAN Integrin beta-5 OS=Homo sapiens GN=ITGB5 PE=1 SV=1	477	1	121.464	1	N	TCGCSVGIEPNSARCNGSGTYVCGICECSPG	136.6	121.46	_NAIKEGDN(de)ITIK_	2	2	1235	-0.022228
>sp|P01591|IGJ_HUMAN Immunoglobulin J chain OS=Homo sapiens GN=IGJ PE=1 SV=4	71	1	121.021	1	N	VERNIRIIVPINNRENISDPTSPIRTRFVYH	87.667	121.02	_MDGSINFN(de)R_	2	2	615.304	0.15033
>sp|P08648|ITA5_HUMAN Integrin alpha-5 OS=Homo sapiens GN=ITGA5 PE=1 SV=2	773	1	120.528	1	N	ICIKGSQWSDIEEFCNRSCEVPTRINSASIK	109.68	120.53	_GIN(de)VTISSIGR_	12	3	543.56	-0.25367
>sp|Q01151|CD83_HUMAN CD83 antigen OS=Homo sapiens GN=CD83 PE=1 SV=1	117	1	114.641	1	N	SGTYRCTIQDPDGQRNISGKVIIRVTGCPAQ	168.61	114.64	_WICDGDNDCGNSEDESN(de)ATCSAR_	11	2	845.397	0.97734
>sp|Q07954|LRP1_HUMAN Prolow-density lipoprotein receptor-related protein 1 OS=Homo sapiens GN=LRP1 PE=1 SV=2	3788	1	114.641	1	N	EEDCSIDPKITSCATNASICGDEARCVRTEK	167.14	114.64	_GSN(de)YSEIIDKYFK_	7	3	576.251	0.72934
>sp|Q9H015|S22A4_HUMAN Solute carrier family 22 member 4 OS=Homo sapiens GN=SLC22A4 PE=1 SV=3;>sp|O76082-3|S22A5_HUMAN Isoform 3 of Solute carrier family 22 member 5 OS=Homo sapiens GN=SLC22A5;>sp|O76082|S22A5_HUMAN Solute carrier family 22 member 5 OS=Homo sapiens GN=SLC22A5 PE=1 SV=1	5	1	114.563	1	N	IAGTPEHRCRVPDAANISSAWRNNSVPIRIR	239.75	114.56	_QVAIQTFGN(de)QTTIIPAGGAGYK_	6	2	644.32	0.70621
>sp|Q07954|LRP1_HUMAN Prolow-density lipoprotein receptor-related protein 1 OS=Homo sapiens GN=LRP1 PE=1 SV=2	2905	1	113.527	1	N	KFYPQRIQITWIENGNVSRTETASTVTENKD	167.89	113.53	_FN(de)STEYQVVTR_	10	2	766.391	0.097887
>sp|P28300|LYOX_HUMAN Protein-lysine 6-oxidase OS=Homo sapiens GN=LOX PE=1 SV=2	81	1	113.33	1	N	PQRRRDPGAAVPGAANASAQQPRTPIIIIRD	145.81	113.33	_M(ox)IANIQN(de)ISIQNNR_	12	3	612.31	-0.44874
>sp|P05362|ICAM1_HUMAN Intercellular adhesion molecule 1 OS=Homo sapiens GN=ICAM1 PE=1 SV=2	267	1	112.777	1	N	ADGTVNQIEGEATPVNITEPAKIEVKFSWFM	96.229	164.94	_ASSSWQSVN(de)ESGDQVHWSPGQAR_	16	3	908.803	-0.077733
>sp|Q687X5|STEA4_HUMAN Metalloreductase STEAP4 OS=Homo sapiens GN=STEAP4 PE=1 SV=1	323	1	112.498	1	N	TIVIPIRYYVRWRIGNITVTQAIIKKENPFS	195.6	112.5	_SSDN(de)VSVTVIR_	3	3	467.289	0.56965
>sp|P30825|CTR1_HUMAN High affinity cationic amino acid transporter 1 OS=Homo sapiens GN=SLC7A1 PE=1 SV=1	226	1	111.608	1	N	KGSVKNWQITEEDFGNTSGRICINNDTKEGK	148.48	141.34	_DIN(de)ETIHYM(ox)YK_	11	3	585.592	0.22409
>sp|P02765|FETUA_HUMAN Alpha-2-HS-glycoprotein OS=Homo sapiens GN=AHSG PE=1 SV=1	156	1	107.14	1	N	DVRKVCQDCPIIAPINDTRVVHAAKAAIAAF	91.401	107.14	_DIN(de)SVIADNIK_	12	3	591.615	-0.3994
>sp|Q9P2B2|FPRP_HUMAN Prostaglandin F2 receptor negative regulator OS=Homo sapiens GN=PTGFRN PE=1 SV=2	600	1	106.929	1	N	VIIMAEKPVGDISSPNETKYIISIDQDSVVK	296.47	106.93	_GTAGNAIIEGASQIVGEN(de)R_	18	3	760.387	-0.79468
>sp|O75751|S22A3_HUMAN Solute carrier family 22 member 3 OS=Homo sapiens GN=SLC22A3 PE=1 SV=1	72	1	106.618	1	N	AAIAERCGWSPEEEWNRTAPASRGPEPPERR	78.441	106.62	_ISN(de)SSDTVECECSENWK_	10	2	725.788	-0.11562
>sp|P13473-3|LAMP2_HUMAN Isoform LAMP-2C of Lysosome-associated membrane glycoprotein 2 OS=Homo sapiens GN=LAMP2;>sp|P13473|LAMP2_HUMAN Lysosome-associated membrane glycoprotein 2 OS=Homo sapiens GN=LAMP2 PE=1 SV=2;>sp|P13473-2|LAMP2_HUMAN Isoform LAMP-2B of Lysosome-associated membrane glycoprotein 2 OS=Homo sapiens GN=LAMP2	49;49;49	1	106.423	1	N	TDSENATCIYAKWQMNFTVRYETTNKTYKTV	127.61	106.42	_IITADN(de)QTYM(ox)AVQGSTAYIICK_	4	2	549.755	0.0077601
>sp|Q9GZU1|MCLN1_HUMAN Mucolipin-1 OS=Homo sapiens GN=MCOLN1 PE=1 SV=1	159	1	106.3	1	N	IGRYAYVRGGGDPWTNGSGIAICQRYYHRGH	235.95	106.3	_NQN(de)GTFKDWANAN(de)VSR_	8	3	582.934	-1.0918
>sp|Q9ULV1|FZD4_HUMAN Frizzled-4 OS=Homo sapiens GN=FZD4 PE=1 SV=2	59	1	106.294	1	N	RCDPIRISMCQNIGYNVTKMPNIVGHEIQTD	296.47	239.61	_FIRFDPVTGEVN(de)STYPR_	10	2	772.858	-0.12687
>sp|P41222|PTGDS_HUMAN Prostaglandin-H2 D-isomerase OS=Homo sapiens GN=PTGDS PE=1 SV=1	78	1	106.156	1	N	SMCKSVVAPATDGGINITSTFIRKNQCETRT	151.39	106.16	_CTIQQDCTN(de)SSQQHFWTSASEGPSR_	12	2	960.507	0.22345
>sp|P56199|ITA1_HUMAN Integrin alpha-1 OS=Homo sapiens GN=ITGA1 PE=1 SV=2	317	1	105.992	1	N	IQRFSIAIIGSYNRGNISTEKFVEEIKSIAS	161.86	105.99	_ISSSN(de)ASVAWMPGADGR_	2	2	747.888	0.27394
>sp|P12273|PIP_HUMAN Prolactin-inducible protein OS=Homo sapiens GN=PIP PE=1 SV=1	105	1	105.975	1	N	ICDDNPKTFYWDFYTNRTVQIAAVVDVIREI	127.57	105.98	_TASCSN(de)VTCWIK_	9	2	707.309	0.64009
>sp|P02786|TFR1_HUMAN Transferrin receptor protein 1 OS=Homo sapiens GN=TFRC PE=1 SV=2	251	1	104.881	1	N	NFGTKKDFEDIYTPVNGSIVIVRAGKITFAE	91.937	104.88	_HEN(de)TSSSPIQYEFSITR_	11	2	1033.54	0.28083
>sp|P35555|FBN1_HUMAN Fibrillin-1 OS=Homo sapiens GN=FBN1 PE=1 SV=3	448	1	104.866	1	N	EYIYPSREPPRVIPVNVTDYCQIVRYICQNG	150.27	104.87	_DWANAN(de)VSR_	5	3	559.627	0.35065
>sp|P07998|RNAS1_HUMAN Ribonuclease pancreatic OS=Homo sapiens GN=RNASE1 PE=1 SV=4	116	1	104.824	1	N	YKSNSSMHITDCRITNGSRYPNCAYRTSPKE	108.18	104.82	_ISMCQNIGYN(de)VTK_	3	3	525.24	-0.10482
>sp|Q13641|TPBG_HUMAN Trophoblast glycoprotein OS=Homo sapiens GN=TPBG PE=1 SV=1	81	1	103.909	1	N	CECSEAARTVKCVNRNITEVPTDIPAYVRNI	184.99	103.91	_NYHQPAIIN(de)SSAIR_	1	3	530.279	0.15937
>sp|Q6EMK4|VASN_HUMAN Vasorin OS=Homo sapiens GN=VASN PE=1 SV=1	117	1	103.7	1	N	ISNIDITANRIHEITNETFRGIRRIERIYIG	192.55	103.7	_AFN(de)WFSYITNHKR_	6	3	420.879	-0.064659
>sp|P08185|CBG_HUMAN Corticosteroid-binding globulin OS=Homo sapiens GN=SERPINA6 PE=1 SV=1	96	1	103.137	1	N	TCGHTRAQIIQGIGFNITERSETEIHQGFQH	109.83	103.14	_QQIN(de)ASIQIAEK_	10	2	780.923	-0.33306
>sp|P26006-1|ITA3_HUMAN Isoform 2 of Integrin alpha-3 OS=Homo sapiens GN=ITGA3;>sp|P26006|ITA3_HUMAN Integrin alpha-3 OS=Homo sapiens GN=ITGA3 PE=1 SV=5	86;86	1	103.083	1	N	IAGAPREIAVPDGYTNRTGAVYICPITAHKD	143.94	103.08	_QTIFFN(de)GTR_	10	2	618.299	-0.33293
>sp|O15031|PLXB2_HUMAN Plexin-B2 OS=Homo sapiens GN=PLXNB2 PE=1 SV=3	528	1	103.009	1	N	SRSKSCVAVTSAQPQNMSRRAQGEVQITVSP	69.716	103.01	_VDN(de)ITDQFCN(de)ASVVDPACVR_	14	3	617.961	-0.41937
>sp|Q9UBX1|CATF_HUMAN Cathepsin F OS=Homo sapiens GN=CTSF PE=1 SV=1	378	1	102.717	1	N	MQSCNFSAEKAKVYINDSVEISQNEQKIAAW	330.28	124.07	_YN(de)GVFQECCQAEDKGACIIPK_	4	3	589.62	0.2215
>sp|P02749|APOH_HUMAN Beta-2-glycoprotein 1 OS=Homo sapiens GN=APOH PE=1 SV=3	253	1	102.661	1	N	YSIDGPEEIECTKIGNWSAMPSCKASCKVPV	90.422	102.66	_GQTEIQVN(de)CPPAVTEN(de)K_	3	2	634.276	0.40062
>sp|P02765|FETUA_HUMAN Alpha-2-HS-glycoprotein OS=Homo sapiens GN=AHSG PE=1 SV=1	156	1	102.52	1	N	DVRKVCQDCPIIAPINDTRVVHAAKAAIAAF	91.313	102.52	_DIGPTIAN(de)STHHN(de)VR_	12	3	591.615	-0.41869
>sp|P30825|CTR1_HUMAN High affinity cationic amino acid transporter 1 OS=Homo sapiens GN=SLC7A1 PE=1 SV=1	226	1	102.224	1	N	KGSVKNWQITEEDFGNTSGRICINNDTKEGK	148.24	119.65	_IIITCSIN(de)DSATEVTGHR_	11	3	585.592	0.41187
>sp|Q03924|ZN117_HUMAN Zinc finger protein 117 OS=Homo sapiens GN=ZNF117 PE=2 SV=5	175	1	101.974	1	N	TGEKPYKCKECGKAFNQTSHIIRHKRIHTEE	169.04	101.97	_EPGSN(de)VTMSVDAECVPMVR_	3	2	594.312	-0.12077
>sp|P11717|MPRI_HUMAN Cation-independent mannose-6-phosphate receptor OS=Homo sapiens GN=IGF2R PE=1 SV=3	543	1	101.956	1	N	ARGCPEDAAVCAVDKNGSKNIGKFISSPMKE	126.69	101.96	_TAVN(de)CSSDFDACIITK_	14	2	889.888	-0.89505
>sp|P20908|CO5A1_HUMAN Collagen alpha-1(V) chain OS=Homo sapiens GN=COL5A1 PE=1 SV=3	176	1	101.381	1	N	SDGKWHRIAISVHKKNVTIIIDCKKKTTKFI	140.22	101.38	_RCGPIN(de)VTIAAEACR_	1	2	538.786	0.52743
>sp|P11717|MPRI_HUMAN Cation-independent mannose-6-phosphate receptor OS=Homo sapiens GN=IGF2R PE=1 SV=3	871	1	101.331	1	N	GPVVEDSGSIIIEYVNGSACTTSDGRQTTYT	125.97	101.33	_NNVITIN(de)ITGK_	17	3	929.099	0.059424
>sp|P10253|LYAG_HUMAN Lysosomal alpha-glucosidase OS=Homo sapiens GN=GAA PE=1 SV=4	470	1	101.304	1	N	YRPYDEGIRRGVFITNETGQPIIGKVWPGST	117.4	101.3	_TIAGEN(de)QTAFEIEEINR_	7	3	577.653	0.028385
>sp|P01833|PIGR_HUMAN Polymeric immunoglobulin receptor OS=Homo sapiens GN=PIGR PE=1 SV=4	469	1	101.203	1	N	EIKIIEGEPNIKVPGNVTAVIGETIKVPCHF	88.73	101.2	_IGN(de)WSAM(ox)PSCK_	4	2	699.896	0.1018
>sp|Q07954|LRP1_HUMAN Prolow-density lipoprotein receptor-related protein 1 OS=Homo sapiens GN=LRP1 PE=1 SV=2	446	1	100.187	1	N	ANAQQKTSVIRVNRFNSTEYQVVTRVDKGGA	171.26	100.19	_SMAGSGHN(de)VSQEAIAIK_	2	2	672.825	-0.17454
>sp|Q9H3G5|CPVL_HUMAN Probable serine carboxypeptidase CPVL OS=Homo sapiens GN=CPVL PE=1 SV=2	81	1	99.2826	1	N	FPGINMKSYAGFITVNKTYNSNIFFWFFPAQ	248.25	99.283	_YSVIIMAEKPVGDISSPN(de)ETK_	9	2	550.785	0.19989
>sp|P08648|ITA5_HUMAN Integrin alpha-5 OS=Homo sapiens GN=ITGA5 PE=1 SV=2	593	1	99.2826	1	N	NGAREDCREMKIYIRNESEFRDKISPIHIAI	113.99	99.283	_DINSQQEIQN(de)ITTDTR_	5	3	524.267	-0.081351
>sp|P08603|CFAH_HUMAN Complement factor H OS=Homo sapiens GN=CFH PE=1 SV=4	911	1	98.5924	1	N	KISYTCEGGFRISEENETTCYMGKWSSPPQC	111.34	98.592	_VTGIN(de)CTTNHPINPK_	5	2	781.821	0.062712
>sp|P17301|ITA2_HUMAN Integrin alpha-2 OS=Homo sapiens GN=ITGA2 PE=1 SV=1	105	1	97.8043	1	N	ATCEKINIQTSTSIPNVTEMKTNMSIGIIIT	133.81	123.36	_QN(de)QCFYN(de)SSYINVQR_	11	2	888.956	0.28187
>sp|P18084|ITB5_HUMAN Integrin beta-5 OS=Homo sapiens GN=ITGB5 PE=1 SV=1	505	1	97.0223	1	N	SPGYIGTRCECQDGENQSVYQNICREAEGKP	137.21	133.66	_IN(de)YQVDSWEEMINK_	8	3	720.951	-1.1989
>sp|P15328|FOLR1_HUMAN Folate receptor alpha OS=Homo sapiens GN=FOLR1 PE=1 SV=3	161	1	96.1713	1	N	CRTSYTCKSNWHKGWNWTSGFNKCAVGAACQ	127.83	96.171	_DEGICSAN(de)VTR_	3	2	599.762	-0.69983
>sp|P07339|CATD_HUMAN Cathepsin D OS=Homo sapiens GN=CTSD PE=1 SV=1	263	1	94.7168	1	N	GGTDSKYYKGSISYINVTRKAYWQVHIDQVE	99.021	94.717	_YSVAN(de)DTGFVDIPKQEK_	10	2	782.904	0.4087
>sp|P11717|MPRI_HUMAN Cation-independent mannose-6-phosphate receptor OS=Homo sapiens GN=IGF2R PE=1 SV=3	543	1	94.5693	1	N	ARGCPEDAAVCAVDKNGSKNIGKFISSPMKE	125.82	94.569	_M(ox)SVINFECN(de)K_	14	2	889.888	-0.72412
>sp|P11117|PPAL_HUMAN Lysosomal acid phosphatase OS=Homo sapiens GN=ACP2 PE=1 SV=3;>sp|P11117-2|PPAL_HUMAN Isoform 2 of Lysosomal acid phosphatase OS=Homo sapiens GN=ACP2	92;92	1	92.5385	1	N	WEIGQAIRQRYHGFINTSYHRQEVYVRSTDF	120.87	92.538	_ITN(de)GSRYPNCAYR_	6	3	465.886	0.032424
>sp|Q13641|TPBG_HUMAN Trophoblast glycoprotein OS=Homo sapiens GN=TPBG PE=1 SV=1	256	1	92.5352	1	N	ISNNSIVSITYVSFRNITHIESIHIEDNAIK	180.11	133.48	_AKPQGQWAEDVIGN(de)K_	1	3	616.655	0.11934
>sp|P18084|ITB5_HUMAN Integrin beta-5 OS=Homo sapiens GN=ITGB5 PE=1 SV=1	477	1	92.0984	1	N	TCGCSVGIEPNSARCNGSGTYVCGICECSPG	136.38	92.098	_CATPHGDN(de)ASIEATFVKR_	2	2	1235	-0.44075
>sp|P40189|IL6RB_HUMAN Interleukin-6 receptor subunit beta OS=Homo sapiens GN=IL6ST PE=1 SV=2;>sp|P40189-3|IL6RB_HUMAN Isoform 3 of Interleukin-6 receptor subunit beta OS=Homo sapiens GN=IL6ST	390;390	1	91.6583	1	N	SHIQNYTVNATKITVNITNDRYIATITVRNI	155.57	91.658	_WCPQNSSCVN(de)ATACR_	4	2	524.269	0.020284
>sp|P52569-3|CTR2_HUMAN Isoform 3 of Low affinity cationic amino acid transporter 2 OS=Homo sapiens GN=SLC7A2;>sp|P52569-2|CTR2_HUMAN Isoform 2 of Low affinity cationic amino acid transporter 2 OS=Homo sapiens GN=SLC7A2;>sp|P52569|CTR2_HUMAN Low affinity cationic amino acid transporter 2 OS=Homo sapiens GN=SLC7A2 PE=1 SV=2	267;267;227	1	91.6203	1	N	KGNVANWKISEEFIKNISASAREPPSENGTS	162.65	91.62	_CTIQDPDGQRN(de)ISGK_	8	3	522.611	0.068445
>sp|Q9P2B2|FPRP_HUMAN Prostaglandin F2 receptor negative regulator OS=Homo sapiens GN=PTGFRN PE=1 SV=2	618	1	91.4567	1	N	KYIISIDQDSVVKIENWTDASRVDGVVIEKV	292.57	91.457	_EGDCPFQSN(de)KTWQDCDYK_	3	2	966.489	0.066735
>sp|Q9NPC4|A4GAT_HUMAN Lactosylceramide 4-alpha-galactosyltransferase OS=Homo sapiens GN=A4GALT PE=2 SV=1	121	1	91.3133	1	N	PESHVIVIMKGIPGGNASIPRHIGISIISCF	265.12	91.313	_YN(de)YTEDPTIIR_	6	2	520.28	-0.0075687
>sp|Q9H0X4|ITFG3_HUMAN Protein ITFG3 OS=Homo sapiens GN=ITFG3 PE=1 SV=1;>sp|Q9H0X4-2|ITFG3_HUMAN Isoform 2 of Protein ITFG3 OS=Homo sapiens GN=ITFG3	314;314	1	90.8606	1	N	SGGPFKSDPHWESMINATTRRMISHSSGAVR	231.58	90.861	_CRN(de)YSIIIDQPDKCAK_	10	3	549.247	0.73346
>sp|P11047|LAMC1_HUMAN Laminin subunit gamma-1 OS=Homo sapiens GN=LAMC1 PE=1 SV=3	1395	1	90.7702	1	N	NKTAAEEAIRKIPAINQTITEANEKTREAQQ	119.4	127.71	_SSCGKEN(de)TSDPSIVIAFGR_	6	3	557.637	0.54803
>sp|Q86XR7-2|TCAM2_HUMAN Isoform 2 of TIR domain-containing adapter molecule 2 OS=Homo sapiens GN=TICAM2;>sp|Q9Y3B3|TMED7_HUMAN Transmembrane emp24 domain-containing protein 7 OS=Homo sapiens GN=TMED7 PE=1 SV=2;>sp|Q9Y3B3-2|TMED7_HUMAN Isoform 2 of Transmembrane emp24 domain-containing protein 7 OS=Homo sapiens GN=TMED7	103;103;103	1	90.7588	1	N	EMKKQYDSFTFTASKNGTYKFCFSNEFSTFT	204.94	90.759	_SDEYN(de)CSSGM(ox)CIR_	12	3	620.288	-0.98383
>sp|Q6UVK1|CSPG4_HUMAN Chondroitin sulfate proteoglycan 4 OS=Homo sapiens GN=CSPG4 PE=1 SV=2	2075	1	90.7309	1	N	TIRIDPTVIDAGEIANRTGSVPRFRIIEGPR	198.87	90.731	_DICGPDAGPIGN(de)ATGQADCKAQDER_	13	3	495.591	-0.077688
>sp|P19075|TSN8_HUMAN Tetraspanin-8 OS=Homo sapiens GN=TSPAN8 PE=1 SV=1	118	1	90.5832	1	N	GIIGAVFKSKSDRIVNETIYENTKIISATGE	137.79	152.4	_DTN(de)GSQFFITTVK_	3	2	662.835	0.63432
>sp|O15031|PLXB2_HUMAN Plexin-B2 OS=Homo sapiens GN=PLXNB2 PE=1 SV=3	844	1	89.9589	1	N	GVQAGDIQRISVAGRNCSFQPERYSVSTRIV	68.576	89.959	_SKSCVAVTSAQPQN(de)MSR_	7	3	541.263	-1.7114
>sp|P28827-2|PTPRM_HUMAN Isoform 2 of Receptor-type tyrosine-protein phosphatase mu OS=Homo sapiens GN=PTPRM;>sp|P28827|PTPRM_HUMAN Receptor-type tyrosine-protein phosphatase mu OS=Homo sapiens GN=PTPRM PE=1 SV=2	534;534	1	89.8657	1	N	TYKAVSSFDPEIDISNQSGRVSKIGNETHFI	147.25	89.866	_N(de)TSVGPIYSGCR_	13	2	911.926	0.79864
>sp|O75751|S22A3_HUMAN Solute carrier family 22 member 3 OS=Homo sapiens GN=SLC22A3 PE=1 SV=1	72	1	89.8046	1	N	AAIAERCGWSPEEEWNRTAPASRGPEPPERR	78.326	89.805	_ITVN(de)ITNDR_	10	2	725.788	-0.17957
>sp|Q9NY97|B3GN2_HUMAN UDP-GlcNAc:betaGal beta-1,3-N-acetylglucosaminyltransferase 2 OS=Homo sapiens GN=B3GNT2 PE=1 SV=2;>sp|Q9NY97-2|B3GN2_HUMAN Isoform 2 of UDP-GlcNAc:betaGal beta-1,3-N-acetylglucosaminyltransferase 2 OS=Homo sapiens GN=B3GNT2	173;169	1	88.9922	1	N	RQAIRESWGQESNAGNQTVVRVFIIGQTPPE	285.75	88.992	_SNYEIN(de)DTISQMGIK_	11	2	882.395	0.50322
>sp|O75954|TSN9_HUMAN Tetraspanin-9 OS=Homo sapiens GN=TSPAN9 PE=1 SV=1	180	1	88.9479	1	N	VPDRCCMENSQGCGRNATTPIWRTGCYEKVK	80.609	88.948	_AGYDN(de)AHSAPSIGMVSN(de)GSTIIN(de)HTSDR_	1	2	480.251	0.35973
>sp|P20908|CO5A1_HUMAN Collagen alpha-1(V) chain OS=Homo sapiens GN=COL5A1 PE=1 SV=3	176	1	88.4955	1	N	SDGKWHRIAISVHKKNVTIIIDCKKKTTKFI	139.9	88.495	_N(de)ITIVTGAPR_	1	2	538.786	0.33744
>sp|P15151|PVR_HUMAN Poliovirus receptor OS=Homo sapiens GN=PVR PE=1 SV=2;>sp|P15151-4|PVR_HUMAN Isoform Delta of Poliovirus receptor OS=Homo sapiens GN=PVR;>sp|P15151-2|PVR_HUMAN Isoform Beta of Poliovirus receptor OS=Homo sapiens GN=PVR;>sp|P15151-3|PVR_HUMAN Isoform Gamma of Poliovirus receptor OS=Homo sapiens GN=PVR	120;120;120;120	1	88.2641	1	N	NASIRMFGIRVEDEGNYTCIFVTFPQGSRSV	130.24	88.264	_IIQQTWN(de)R_	6	3	740.669	0.14347
>sp|O75629|CREG1_HUMAN Protein CREG1 OS=Homo sapiens GN=CREG1 PE=1 SV=1	216	1	88.075	1	N	DYFGGPKIVTPEEYYNVTVQ___________	77.324	88.075	_N(de)YYADNQTCDGEIIFN(de)MTK_	9	2	778.38	0.29477
>sp|P02749|APOH_HUMAN Beta-2-glycoprotein 1 OS=Homo sapiens GN=APOH PE=1 SV=3	253	1	88.0206	1	N	YSIDGPEEIECTKIGNWSAMPSCKASCKVPV	90.422	88.021	_QDQCIYNTTYIN(de)VQREN(de)GTISR_	3	2	634.276	0.64836
>sp|P11279|LAMP1_HUMAN Lysosome-associated membrane glycoprotein 1 OS=Homo sapiens GN=LAMP1 PE=1 SV=3	84	1	86.3775	1	N	SDATVVINRSSCGKENTSDPSIVIAFGRGHT	123.28	86.378	_SIVTQYIN(de)ATGNR_	7	3	675.99	-0.061873
>sp|Q96T83|SL9A7_HUMAN Sodium/hydrogen exchanger 7 OS=Homo sapiens GN=SLC9A7 PE=1 SV=1	145	1	86.2877	1	N	ISCTQEDRAFSTIIVNVSGKFFEYTIKGEIS	230.26	86.288	_SYAGFITVN(de)K_	8	2	618.845	-0.13215
>sp|Q12913|PTPRJ_HUMAN Receptor-type tyrosine-protein phosphatase eta OS=Homo sapiens GN=PTPRJ PE=1 SV=3;>sp|Q12913-2|PTPRJ_HUMAN Isoform 2 of Receptor-type tyrosine-protein phosphatase eta OS=Homo sapiens GN=PTPRJ	104;104	1	85.8486	1	N	SSGANDSIRTPEQGSNGTDGASQKTPSSTGP	180.88	85.849	_IN(de)ATDADEPNTINSK_	7	3	964.456	0.3081
>sp|P42892|ECE1_HUMAN Endothelin-converting enzyme 1 OS=Homo sapiens GN=ECE1 PE=1 SV=2;>sp|P42892-4|ECE1_HUMAN Isoform D of Endothelin-converting enzyme 1 OS=Homo sapiens GN=ECE1;>sp|P42892-2|ECE1_HUMAN Isoform A of Endothelin-converting enzyme 1 OS=Homo sapiens GN=ECE1;>sp|P42892-3|ECE1_HUMAN Isoform C of Endothelin-converting enzyme 1 OS=Homo sapiens GN=ECE1	210;207;198;194	1	85.845	1	N	RAKPIMEIIERIGGWNITGPWAKDNFQDTIQ	158.04	85.845	_ICDYENRFN(de)TSK_	5	2	650.838	0.33435
>sp|Q92673|SORL_HUMAN Sortilin-related receptor OS=Homo sapiens GN=SORL1 PE=1 SV=2	1164	1	85.4501	1	N	DESHCEMHQCRSDEYNCSSGMCIRSSWVCDG	216	85.45	_DTAVEGEEIEVN(de)CTAMASKPATTIR_	5	2	798.292	0.43084
>sp|Q14108|SCRB2_HUMAN Lysosome membrane protein 2 OS=Homo sapiens GN=SCARB2 PE=1 SV=2	105	1	85.3609	1	N	TYREIRNKANIQFGDNGTTISAVSNKAYVFE	188.48	167.63	_FGN(de)ITDIN(de)ITK_	10	2	1040.52	0.35173
>sp|P08069|IGF1R_HUMAN Insulin-like growth factor 1 receptor OS=Homo sapiens GN=IGF1R PE=1 SV=1	244	1	85.1414	1	N	ECCHPECIGSCSAPDNDTACVACRHYYYAGV	104.88	149.99	_YFNIDPN(de)ATQASGNCGTR_	22	3	1172.76	-0.1211
>sp|P17301|ITA2_HUMAN Integrin alpha-2 OS=Homo sapiens GN=ITGA2 PE=1 SV=1	343	1	82.6513	1	N	EIKAIASIPTERYFFNVSDEAAIIEKAGTIG	133.66	82.651	_AAISWSNGN(de)GTASCR_	4	2	823.901	0.48374
>sp|O15321|TM9S1_HUMAN Transmembrane 9 superfamily member 1 OS=Homo sapiens GN=TM9SF1 PE=2 SV=2;>sp|O15321-2|TM9S1_HUMAN Isoform 2 of Transmembrane 9 superfamily member 1 OS=Homo sapiens GN=TM9SF1	178;178	1	82.2868	1	N	IDFHIEFHGDRIIFANVSVRDVKPHSIDGIR	73.082	82.287	_YFFN(de)VSDEAAIIEK_	5	2	510.298	-0.0027192
>sp|P19075|TSN8_HUMAN Tetraspanin-8 OS=Homo sapiens GN=TSPAN8 PE=1 SV=1	118	1	81.9581	1	N	GIIGAVFKSKSDRIVNETIYENTKIISATGE	137.62	138.89	_IPIVN(de)ISIIPK_	3	2	662.835	0.47833
>sp|P08648|ITA5_HUMAN Integrin alpha-5 OS=Homo sapiens GN=ITGA5 PE=1 SV=2	593	1	81.865	1	N	NGAREDCREMKIYIRNESEFRDKISPIHIAI	113.63	81.865	_VPDAAN(de)ISSAWRN(de)HTVPIR_	5	3	524.267	0.13507
>sp|P08603|CFAH_HUMAN Complement factor H OS=Homo sapiens GN=CFH PE=1 SV=4	882	1	81.6559	1	N	KIPCSQPPQIEHGTINSSRSSQESYAHGTKI	110.8	81.656	_TEKEPISDPVGTCYISTDN(de)FTR_	15	3	674.662	-0.21333
>sp|P28799|GRN_HUMAN Granulins OS=Homo sapiens GN=GRN PE=1 SV=2;>sp|P28799-2|GRN_HUMAN Isoform 2 of Granulins OS=Homo sapiens GN=GRN;>sp|P28799-3|GRN_HUMAN Isoform 3 of Granulins OS=Homo sapiens GN=GRN	265;265;85	1	81.6316	1	N	DTVCDIIQSKCISKENATTDIITKIPAHTVG	145.81	81.632	_DSIFIN1GYAPQN(de)ISIR_	6	3	532.271	-0.29695
>sp|Q9BY67-3|CADM1_HUMAN Isoform 3 of Cell adhesion molecule 1 OS=Homo sapiens GN=CADM1;>sp|Q9BY67-4|CADM1_HUMAN Isoform 4 of Cell adhesion molecule 1 OS=Homo sapiens GN=CADM1;>sp|Q9BY67|CADM1_HUMAN Cell adhesion molecule 1 OS=Homo sapiens GN=CADM1 PE=1 SV=2;>sp|Q9BY67-5|CADM1_HUMAN Isoform 5 of Cell adhesion molecule 1 OS=Homo sapiens GN=CADM1;>sp|Q9BY67-2|CADM1_HUMAN Isoform 2 of Cell adhesion …	113	1	81.5653	1	N	QIINFSSSEIKVSITNVSISDEGRYFCQIYT	235.21	81.565	_YEDIVIN(de)ETINK_	5	3	459.9	0.25851
>sp|P43251-2|BTD_HUMAN Isoform 2 of Biotinidase OS=Homo sapiens GN=BTD;>sp|P43251-3|BTD_HUMAN Isoform 3 of Biotinidase OS=Homo sapiens GN=BTD;>sp|P43251|BTD_HUMAN Biotinidase OS=Homo sapiens GN=BTD PE=1 SV=2	351	1	81.3173	1	N	IAQVAKNPVGIIGAENATGETDPSHSKFIKI	160.04	104.45	_ISEEFIKN(de)ISASAR_	10	3	699.003	0.094536
>sp|P11047|LAMC1_HUMAN Laminin subunit gamma-1 OS=Homo sapiens GN=LAMC1 PE=1 SV=3	1022	1	81.2133	1	N	FVGNRCDQCEENYFYNRSWPGCQECPACYRI	119.54	141.37	_VIEEFYN(de)QTWVHR_	11	2	849.812	0.43764
>sp|P48723|HSP13_HUMAN Heat shock 70 kDa protein 13 OS=Homo sapiens GN=HSPA13 PE=1 SV=1	184	1	80.9787	1	N	NAVISVPAEFDIKQRNSTIEAANIAGIKIIR	160.38	108.71	_SFSGVIDCGN(de)CSR_	3	3	529.621	-0.0067542
>sp|Q8NHP8|PLBL2_HUMAN Putative phospholipase B-like 2 OS=Homo sapiens GN=PLBD2 PE=1 SV=2	515	1	80.7872	1	N	NGENAISARSDINPANGSYPFQAIRQRSHGG	211.75	198.87	_IAN(de)NTHQHVFDDIR_	7	2	875.923	0.83719
>sp|P14384|CBPM_HUMAN Carboxypeptidase M OS=Homo sapiens GN=CPM PE=1 SV=2	38	1	80.6384	1	N	HRQEGMEAFIKTVAQNYSSVTHIHSIGKSVK	129.37	80.638	_QTECMVEQYSN(de)YSVNGEPVN(de)GR_	5	2	921.971	0.19758
>sp|P41222|PTGDS_HUMAN Prostaglandin-H2 D-isomerase OS=Homo sapiens GN=PTGDS PE=1 SV=1	78	1	80.5855	1	N	SMCKSVVAPATDGGINITSTFIRKNQCETRT	150.91	80.585	_NIGFN(de)CTTSQGK_	12	2	960.507	0.25482
>sp|P08069|IGF1R_HUMAN Insulin-like growth factor 1 receptor OS=Homo sapiens GN=IGF1R PE=1 SV=1	244	1	80.266	1	N	ECCHPECIGSCSAPDNDTACVACRHYYYAGV	105.98	184.59	_GN(de)ITYGYVTIIN(de)GSDIR_	22	3	1172.76	-0.21626
>sp|Q16563|SYPL1_HUMAN Synaptophysin-like protein 1 OS=Homo sapiens GN=SYPL1 PE=1 SV=1;>sp|Q16563-2|SYPL1_HUMAN Isoform 2 of Synaptophysin-like protein 1 OS=Homo sapiens GN=SYPL1	71;53	1	80.003	1	N	GQTEIQVNCPPAVTENKTVTATFGYPFRINE	192.39	171.08	_STYN(de)DTEDVSQASPSESEAR_	16	3	629.304	-0.12893
>sp|Q99650|OSMR_HUMAN Oncostatin-M-specific receptor subunit beta OS=Homo sapiens GN=OSMR PE=1 SV=1;>sp|Q99650-2|OSMR_HUMAN Isoform 2 of Oncostatin-M-specific receptor subunit beta OS=Homo sapiens GN=OSMR	176;176	1	79.6161	1	N	GTNVTICYVSRNIQNNVSCYIEGKQIHGEQI	232.79	104.17	_VQFNIGN(de)SSRPSN(de)QCR_	5	2	770.851	-0.23014
>sp|P41222|PTGDS_HUMAN Prostaglandin-H2 D-isomerase OS=Homo sapiens GN=PTGDS PE=1 SV=1	51	1	79.0217	1	N	QDKFIGRWFSAGIASNSSWIREKKAAISMCK	156.13	79.022	_AGYDNAHSAPSIGM(ox)VSN(de)GSTIIN(de)HTSDR_	9	2	791.886	0.035448
>sp|Q9NY97|B3GN2_HUMAN UDP-GlcNAc:betaGal beta-1,3-N-acetylglucosaminyltransferase 2 OS=Homo sapiens GN=B3GNT2 PE=1 SV=2;>sp|Q9NY97-2|B3GN2_HUMAN Isoform 2 of UDP-GlcNAc:betaGal beta-1,3-N-acetylglucosaminyltransferase 2 OS=Homo sapiens GN=B3GNT2	127;123	1	78.5055	1	N	IPDRFKDFIIYIRCRNYSIIIDQPDKCAKKP	285.75	78.505	_KDN(de)ITAHN(de)ISWR_	3	3	661.321	-0.31279
>sp|P78504|JAG1_HUMAN Protein jagged-1 OS=Homo sapiens GN=JAG1 PE=1 SV=3	1045	1	78.3256	1	N	EITDKIIDIVSKRDGNSSIIAAVAEVRVQRR	167.97	78.326	_KINIDGSN(de)YTIIK_	3	2	701.862	0.16485
>sp|O14773|TPP1_HUMAN Tripeptidyl-peptidase 1 OS=Homo sapiens GN=TPP1 PE=1 SV=2;>sp|O14773-2|TPP1_HUMAN Isoform 2 of Tripeptidyl-peptidase 1 OS=Homo sapiens GN=TPP1	443;200	1	78.3256	1	N	KFISSSPHIPPSSYFNASGRAYPDVAAISDG	68.576	78.326	_AACAVKPQEVQM(ox)VN(de)GTITN(de)PINGK_	15	3	684.666	0.53104
>sp|Q9UBG0|MRC2_HUMAN C-type mannose receptor 2 OS=Homo sapiens GN=MRC2 PE=1 SV=2	497	1	78.2927	1	N	VTIWGPEGRWNDSPCNQSIPSICKKAGQISQ	321.67	169.37	_TVMEN(de)FVAFVDK_	7	2	903.893	-0.17914
>sp|Q8NBJ4|GOLM1_HUMAN Golgi membrane protein 1 OS=Homo sapiens GN=GOLM1 PE=1 SV=1;>sp|Q8NBJ4-2|GOLM1_HUMAN Isoform 2 of Golgi membrane protein 1 OS=Homo sapiens GN=GOLM1	109;99	1	77.6404	1	N	SVNKIYQDEKAVIVNNITTGERIIRVIQDQI	207.55	77.64	_IDGGPVIIIQAGTPHN(de)ITCR_	6	2	644.841	0.60417
>sp|P13987|CD59_HUMAN CD59 glycoprotein OS=Homo sapiens GN=CD59 PE=1 SV=1	43	1	77.4679	1	N	CYNCPNPTADCKTAVNCSSDFDACIITKAGI	128.27	77.468	_TPM(ox)TN(de)SSIQFIDNAFRK_	4	2	901.9	-0.39427
>sp|P15328|FOLR1_HUMAN Folate receptor alpha OS=Homo sapiens GN=FOLR1 PE=1 SV=3	69	1	77.4679	1	N	HEQCRPWRKNACCSTNTSQEAHKDVSYIYRF	127.71	77.468	_AGYDNAHSAPSIGMVSN(de)GSTIIN(de)HTSDR_	7	3	836.025	-0.20343
>sp|Q9NXG6-3|P4HTM_HUMAN Isoform 3 of Transmembrane prolyl 4-hydroxylase OS=Homo sapiens GN=P4HTM;>sp|Q9NXG6|P4HTM_HUMAN Transmembrane prolyl 4-hydroxylase OS=Homo sapiens GN=P4HTM PE=1 SV=2;>sp|Q9NXG6-2|P4HTM_HUMAN Isoform 2 of Transmembrane prolyl 4-hydroxylase OS=Homo sapiens GN=P4HTM	348;348;348	1	77.4203	1	N	PVYPETICSHTKIVANESVPFETSCRQVSPN	280.5	77.42	_ANQQIN(de)FTEAK_	4	2	805.38	-1.454
>sp|O14773|TPP1_HUMAN Tripeptidyl-peptidase 1 OS=Homo sapiens GN=TPP1 PE=1 SV=2;>sp|O14773-2|TPP1_HUMAN Isoform 2 of Tripeptidyl-peptidase 1 OS=Homo sapiens GN=TPP1	443;200	1	77.3241	1	N	KFISSSPHIPPSSYFNASGRAYPDVAAISDG	66.826	77.324	_AISN(de)ISIR_	15	3	684.666	0.042117
>sp|Q92959|SO2A1_HUMAN Solute carrier organic anion transporter family member 2A1 OS=Homo sapiens GN=SLCO2A1 PE=1 SV=2	491	1	77.1914	1	N	NINMSSATSKQIIYINCSCVTGGSASAKTGS	216.29	77.191	_VSITN(de)VSISDEGR_	6	3	643.973	0.78098
>sp|P05090|APOD_HUMAN Apolipoprotein D OS=Homo sapiens GN=APOD PE=1 SV=1	98	1	77.0451	1	N	ADGTVNQIEGEATPVNITEPAKIEVKFSWFM	92.538	77.045	_YMYPKN(de)KTDVEYESDEK_	16	3	909.131	0.39275
>sp|Q07954|LRP1_HUMAN Prolow-density lipoprotein receptor-related protein 1 OS=Homo sapiens GN=LRP1 PE=1 SV=2	3048	1	77.0259	1	N	FANRYYIRKINIDGSNYTIIKQGINNAVAID	167.29	133.15	_DRN(de)ITN(de)CSSVMIPSNDDR_	8	3	493.94	0.12787
>sp|P01833|PIGR_HUMAN Polymeric immunoglobulin receptor OS=Homo sapiens GN=PIGR PE=1 SV=4	469	1	76.8199	1	N	EIKIIEGEPNIKVPGNVTAVIGETIKVPCHF	88.561	76.82	_IN(de)SSVTDIEEIIGVR_	4	2	699.896	0.35876
>sp|P07602-3|SAP_HUMAN Isoform Sap-mu-9 of Prosaposin OS=Homo sapiens GN=PSAP;>sp|P07602-2|SAP_HUMAN Isoform Sap-mu-6 of Prosaposin OS=Homo sapiens GN=PSAP;>sp|P07602|SAP_HUMAN Prosaposin OS=Homo sapiens GN=PSAP PE=1 SV=2	335;334;332	1	76.7593	1	N	VCEFIVKEVTKIIDNNKTEKEIIDAFDKMCS	102.5	76.759	_CN(de)TAAPMWIN(de)GTHPSSDEGIVSR_	5	3	670.009	0.61091
>sp|P29323|EPHB2_HUMAN Ephrin type-B receptor 2 OS=Homo sapiens GN=EPHB2 PE=1 SV=5;>sp|P29323-3|EPHB2_HUMAN Isoform 3 of Ephrin type-B receptor 2 OS=Homo sapiens GN=EPHB2;>sp|P29323-2|EPHB2_HUMAN Isoform 2 of Ephrin type-B receptor 2 OS=Homo sapiens GN=EPHB2	265;265;265	1	76.7282	1	N	PIGRCMCKAGFEAVENGTVCRGCPSGTFKAN	147.62	76.728	_VIPVN(de)VTDYCQIVR_	8	2	705.82	-0.093434
>sp|P15586|GNS_HUMAN N-acetylglucosamine-6-sulfatase OS=Homo sapiens GN=GNS PE=1 SV=3	279	1	76.5803	1	N	TNKHWIIRQAKTPMTNSSIQFIDNAFRKRWQ	131.98	135.47	_CN(de)GSGTYVCGICECSPGYIGTR_	5	3	662.991	0.00030582
>sp|Q95604|1C17_HUMAN HLA class I histocompatibility antigen, Cw-17 alpha chain OS=Homo sapiens GN=HLA-C PE=1 SV=1;>sp|P30501|1C02_HUMAN HLA class I histocompatibility antigen, Cw-2 alpha chain OS=Homo sapiens GN=HLA-C PE=1 SV=1;>sp|P30505|1C08_HUMAN HLA class I histocompatibility antigen, Cw-8 alpha chain OS=Homo sapiens GN=HLA-C PE=2 SV=1;>sp|P30508|1C12_HUMAN HLA class I histocompatibility ant…	110;110;110;110;110;110;110;110;110;110;110	1	76.4154	1	N	GGCTFKDKVIVAARRNASAVVIYNEERYGNI	210.98	132.5	_AFSTIIVN(de)VSGK_	2	3	507.927	0.10084
>sp|Q93086-4|P2RX5_HUMAN Isoform 4 of P2X purinoceptor 5 OS=Homo sapiens GN=P2RX5;>sp|Q93086|P2RX5_HUMAN P2X purinoceptor 5 OS=Homo sapiens GN=P2RX5 PE=2 SV=4;>sp|Q93086-1|P2RX5_HUMAN Isoform 2 of P2X purinoceptor 5 OS=Homo sapiens GN=P2RX5;>sp|Q93086-5|P2RX5_HUMAN Isoform 5 of P2X purinoceptor 5 OS=Homo sapiens GN=P2RX5;>sp|Q93086-2|P2RX5_HUMAN Isoform 3 of P2X purinoceptor 5 OS=Homo sapiens GN=…	77;77;77;77;77	1	76.3575	1	N	IQSAVITKVKGVAFTNTSDIGQRIWDVADYV	208.68	76.358	_GGGDPWTN(de)GSGIAICQR_	8	3	531.946	-0.27597
>sp|P08195-4|4F2_HUMAN Isoform 4 of 4F2 cell-surface antigen heavy chain OS=Homo sapiens GN=SLC3A2;>sp|P08195|4F2_HUMAN 4F2 cell-surface antigen heavy chain OS=Homo sapiens GN=SLC3A2 PE=1 SV=3;>sp|P08195-3|4F2_HUMAN Isoform 3 of 4F2 cell-surface antigen heavy chain OS=Homo sapiens GN=SLC3A2;>sp|P08195-2|4F2_HUMAN Isoform 2 of 4F2 cell-surface antigen heavy chain OS=Homo sapiens GN=SLC3A2	455;424;362;323	1	76.3572	1	N	GSTGEHTKSIVTQYINATGNRWCSWSISQAR	109.83	76.357	_N(de)IN(de)NSQSDVVSFR_	8	2	719.862	-0.26301
>sp|P16278|BGAL_HUMAN Beta-galactosidase OS=Homo sapiens GN=GLB1 PE=1 SV=2;>sp|P16278-3|BGAL_HUMAN Isoform 3 of Beta-galactosidase OS=Homo sapiens GN=GLB1;>sp|P16278-2|BGAL_HUMAN Isoform 2 of Beta-galactosidase OS=Homo sapiens GN=GLB1	464;434;333	1	75.717	1	N	GIPQGVIERNNVITINITGKAGATIDIIVEN	133.48	108.72	_IHNQIIPN(de)VTTVER_	7	2	594.827	0.5781
>sp|P07911-5|UROM_HUMAN Isoform 5 of Uromodulin OS=Homo sapiens GN=UMOD;>sp|P07911|UROM_HUMAN Uromodulin OS=Homo sapiens GN=UMOD PE=1 SV=1;>sp|P07911-4|UROM_HUMAN Isoform 4 of Uromodulin OS=Homo sapiens GN=UMOD;>sp|P07911-2|UROM_HUMAN Isoform 2 of Uromodulin OS=Homo sapiens GN=UMOD;>sp|P07911-3|UROM_HUMAN Isoform 3 of Uromodulin OS=Homo sapiens GN=UMOD	546;513;491;380;484	1	75.507	1	N	RFAIIMTNCYATPSSNATDPIKYFIIQDRCP	106.42	98.443	_AIAGIVYN(de)ASGSEHCYDIYR_	15	2	1158.55	0.18639
>sp|Q29983|MICA_HUMAN MHC class I polypeptide-related sequence A OS=Homo sapiens GN=MICA PE=1 SV=1	79	1	75.376	1	N	KKIGDCISEDSYPDGNITWYRNGKVIHPIEG	186.42	75.376	_NQAIITDETN(de)DSIVAPQEK_	14	3	754.66	-0.078445
>sp|P15848|ARSB_HUMAN Arylsulfatase B OS=Homo sapiens GN=ARSB PE=1 SV=1;>sp|P15848-2|ARSB_HUMAN Isoform 2 of Arylsulfatase B OS=Homo sapiens GN=ARSB	188;188	1	74.9873	1	N	EDYYSHERCTIIDAINVTRCAIDFRDGEEVA	133.16	74.987	_IVN(de)ETIYENTK_	8	2	638.832	-0.57726
>sp|P26006-1|ITA3_HUMAN Isoform 2 of Integrin alpha-3 OS=Homo sapiens GN=ITGA3;>sp|P26006|ITA3_HUMAN Integrin alpha-3 OS=Homo sapiens GN=ITGA3 PE=1 SV=5	86;86	1	74.9442	1	N	IAGAPREIAVPDGYTNRTGAVYICPITAHKD	143.88	74.944	_NWQITEEDFGN(de)TSGR_	10	2	618.299	0.32857
>sp|P05106|ITB3_HUMAN Integrin beta-3 OS=Homo sapiens GN=ITGB3 PE=1 SV=2;>sp|P05106-3|ITB3_HUMAN Isoform Beta-3C of Integrin beta-3 OS=Homo sapiens GN=ITGB3;>sp|P05106-2|ITB3_HUMAN Isoform Beta-3B of Integrin beta-3 OS=Homo sapiens GN=ITGB3	478;478;478	1	74.8834	1	N	CQAQAEPNSHRCNNGNGTFECGVCRCGPGWI	96.544	172.57	_INPTVTYGN(de)DSFSAK_	5	2	823.803	0.11031
>sp|Q9GZX9|TWSG1_HUMAN Twisted gastrulation protein homolog 1 OS=Homo sapiens GN=TWSG1 PE=2 SV=1;>sp|Q9GZX9-2|TWSG1_HUMAN Isoform 2 of Twisted gastrulation protein homolog 1 OS=Homo sapiens GN=TWSG1	52;52	1	74.7857	1	N	KCIIQEICQCRPGEGNCSCCKECMICIGAIW	237.48	74.786	_N(de)QNGTFKDWAN(de)ANVSR_	15	3	844.007	-0.51076
>sp|P04156|PRIO_HUMAN Major prion protein OS=Homo sapiens GN=PRNP PE=1 SV=1;>sp|P04156-2|PRIO_HUMAN Isoform 2 of Major prion protein OS=Homo sapiens GN=PRNP	197;190	1	74.4284	1	N	ITIKQHTVTTTTKGENFTETDVKMMERVVEQ	93.623	74.428	_SICNSIISIN(de)TTISCSEAQK_	12	4	535.262	0.041123
>sp|P42892|ECE1_HUMAN Endothelin-converting enzyme 1 OS=Homo sapiens GN=ECE1 PE=1 SV=2;>sp|P42892-4|ECE1_HUMAN Isoform D of Endothelin-converting enzyme 1 OS=Homo sapiens GN=ECE1;>sp|P42892-2|ECE1_HUMAN Isoform A of Endothelin-converting enzyme 1 OS=Homo sapiens GN=ECE1;>sp|P42892-3|ECE1_HUMAN Isoform C of Endothelin-converting enzyme 1 OS=Homo sapiens GN=ECE1	210;207;198;194	1	74.3925	1	N	RAKPIMEIIERIGGWNITGPWAKDNFQDTIQ	157.96	74.392	_FASISVYKPIAGN(de)NSFYGSK_	5	2	650.838	0.045374
>sp|P18084|ITB5_HUMAN Integrin beta-5 OS=Homo sapiens GN=ITGB5 PE=1 SV=1	505	1	74.3772	1	N	SPGYIGTRCECQDGENQSVYQNICREAEGKP	136.46	104.55	_IKIDN(de)YSTQEIGK_	8	3	720.951	-0.59619
>sp|Q3T906|GNPTA_HUMAN N-acetylglucosamine-1-phosphotransferase subunits alpha/beta OS=Homo sapiens GN=GNPTAB PE=1 SV=1	759	1	74.1451	1	N	QHAKIKNQAIITDETNDSIVAPQEKQVHKSI	193.64	148.06	_IIAN(de)SSMIGEGQVIR_	10	2	1044.01	0.16099
>sp|Q96J84-2|KIRR1_HUMAN Isoform 2 of Kin of IRRE-like protein 1 OS=Homo sapiens GN=KIRREL;>sp|Q96J84|KIRR1_HUMAN Kin of IRRE-like protein 1 OS=Homo sapiens GN=KIRREL PE=1 SV=2	140;140	1	73.8334	1	N	IDGGPVIIIQAGTPHNITCRAFNAKPAATII	228.25	73.833	_IINKFN(de)SSSSSIEEK_	16	3	711.709	0.36177
>sp|P13598|ICAM2_HUMAN Intercellular adhesion molecule 2 OS=Homo sapiens GN=ICAM2 PE=1 SV=2	153	1	73.7813	1	N	TVEPIDSITIFIFRGNETIHYETFGKAAPAP	127.71	73.781	_GWN(de)WTSGFN(de)K_	2	3	466.217	-0.6988
>sp|P07602-3|SAP_HUMAN Isoform Sap-mu-9 of Prosaposin OS=Homo sapiens GN=PSAP;>sp|P07602-2|SAP_HUMAN Isoform Sap-mu-6 of Prosaposin OS=Homo sapiens GN=PSAP;>sp|P07602|SAP_HUMAN Prosaposin OS=Homo sapiens GN=PSAP PE=1 SV=2	80;80;80	1	73.7222	1	N	ICKDVVTAAGDMIKDNATEEEIIVYIEKTCD	102.06	73.722	_IVDVN(de)ITSEGK_	2	2	833.907	0.4815
>sp|P12273|PIP_HUMAN Prolactin-inducible protein OS=Homo sapiens GN=PIP PE=1 SV=1	105	1	73.4995	1	N	ICDDNPKTFYWDFYTNRTVQIAAVVDVIREI	127.17	73.499	_VIEQSYN(de)ETWIGR_	9	2	707.309	0.47623
>sp|P15848|ARSB_HUMAN Arylsulfatase B OS=Homo sapiens GN=ARSB PE=1 SV=1;>sp|P15848-2|ARSB_HUMAN Isoform 2 of Arylsulfatase B OS=Homo sapiens GN=ARSB	366;366	1	73.3864	1	N	SDWIPTIVKIARGHTNGTKPIDGFDVWKTIS	133.13	73.386	_VCDGIIDCPGREDENN(de)TSTGK_	4	3	591.625	0.95636
>sp|P05106|ITB3_HUMAN Integrin beta-3 OS=Homo sapiens GN=ITGB3 PE=1 SV=2;>sp|P05106-3|ITB3_HUMAN Isoform Beta-3C of Integrin beta-3 OS=Homo sapiens GN=ITGB3;>sp|P05106-2|ITB3_HUMAN Isoform Beta-3B of Integrin beta-3 OS=Homo sapiens GN=ITGB3	478;478;478	1	73.1319	1	N	CQAQAEPNSHRCNNGNGTFECGVCRCGPGWI	96.773	176.89	_ITGVSN(de)IDFR_	5	2	823.803	0.1326
>sp|Q9P2R6|RERE_HUMAN Arginine-glutamic acid dipeptide repeats protein OS=Homo sapiens GN=RERE PE=1 SV=2;>sp|Q9P2R6-2|RERE_HUMAN Isoform 2 of Arginine-glutamic acid dipeptide repeats protein OS=Homo sapiens GN=RERE	647;93	1	73.082	1	N	SAKKVKEEASSPIKSNKRQREKVASDTEEAD	312.05	73.082	_IKPDPN(de)TICDEFK_	12	3	473.256	0.071716
>sp|P01033|TIMP1_HUMAN Metalloproteinase inhibitor 1 OS=Homo sapiens GN=TIMP1 PE=1 SV=1	101	1	73.082	1	N	TPAMESVCGYFHRSHNRSEEFIIAGKIQDGI	82.925	73.082	_VPGN(de)VTAVIGETIK_	3	3	496.92	0.38006
>sp|Q9H0X4|ITFG3_HUMAN Protein ITFG3 OS=Homo sapiens GN=ITFG3 PE=1 SV=1;>sp|Q9H0X4-2|ITFG3_HUMAN Isoform 2 of Protein ITFG3 OS=Homo sapiens GN=ITFG3	389;389	1	72.5594	1	N	IRNKGTNIYCEASQGNVSEGMKGIVIFVSKV	232.49	95.205	_IN(de)YTDPFSN(de)QTVK_	14	3	729.993	-1.4546
>sp|P08473|NEP_HUMAN Neprilysin OS=Homo sapiens GN=MME PE=1 SV=2	145	1	72.4959	1	N	IVAVQKAKAIYRSCINESAIDSRGGEPIIKI	110.53	72.496	_NYKNPN(de)ITISFTAER_	4	2	626.777	0.57587
>sp|O75503|CLN5_HUMAN Ceroid-lipofuscinosis neuronal protein 5 OS=Homo sapiens GN=CLN5 PE=1 SV=2	352	1	72.2004	1	N	PFIKITYEEIPIPIRNKTISGI_________	77.062	72.2	_VN(de)ETEM(ox)DIAK_	12	3	529.631	0.20081
>sp|Q6YHK3|CD109_HUMAN CD109 antigen OS=Homo sapiens GN=CD109 PE=1 SV=2;>sp|Q6YHK3-4|CD109_HUMAN Isoform 4 of CD109 antigen OS=Homo sapiens GN=CD109;>sp|Q6YHK3-3|CD109_HUMAN Isoform 3 of CD109 antigen OS=Homo sapiens GN=CD109	118;118;118	1	71.8061	1	N	EIRVTGRTQDEIIFSNSTRISFETKRISVFI	202.63	71.806	_HPDAVAWAN(de)ITN(de)AIR_	9	2	706.339	-0.21655
>sp|P32004|L1CAM_HUMAN Neural cell adhesion molecule L1 OS=Homo sapiens GN=L1CAM PE=1 SV=2;>sp|P32004-2|L1CAM_HUMAN Isoform 2 of Neural cell adhesion molecule L1 OS=Homo sapiens GN=L1CAM;>sp|P32004-3|L1CAM_HUMAN Isoform 3 of Neural cell adhesion molecule L1 OS=Homo sapiens GN=L1CAM	726;726;721	1	71.6009	1	N	PQRRRDPGAAVPGAANASAQQPRTPIIIIRD	144.8	71.601	_QCIEEAQIEN(de)ETIGCSK_	13	4	498.51	-0.30572
>sp|P01009|A1AT_HUMAN Alpha-1-antitrypsin OS=Homo sapiens GN=SERPINA1 PE=1 SV=3;>sp|P01009-2|A1AT_HUMAN Isoform 2 of Alpha-1-antitrypsin OS=Homo sapiens GN=SERPINA1;>sp|P01009-3|A1AT_HUMAN Isoform 3 of Alpha-1-antitrypsin OS=Homo sapiens GN=SERPINA1	271;271;271	1	71.5582	1	N	CKKISSWVIIMKYIGNATAIFFIPDEGKIQH	85.837	71.558	_WN(de)VTSIETIK_	4	2	878.943	0.015345
>sp|P07602-3|SAP_HUMAN Isoform Sap-mu-9 of Prosaposin OS=Homo sapiens GN=PSAP;>sp|P07602-2|SAP_HUMAN Isoform Sap-mu-6 of Prosaposin OS=Homo sapiens GN=PSAP;>sp|P07602|SAP_HUMAN Prosaposin OS=Homo sapiens GN=PSAP PE=1 SV=2	215;215;215	1	71.5575	1	N	DCIQMVTDIQTAVRTNSTFVQAIVEHVKEEC	101.89	71.558	_IQN(de)MTVDECFQSR_	2	3	525.279	-0.34125
>sp|Q99808|S29A1_HUMAN Equilibrative nucleoside transporter 1 OS=Homo sapiens GN=SLC29A1 PE=1 SV=3	48	1	71.3538	1	N	MTATQYFTNRIDMSQNVSIVTAEISKDAQAS	233.31	71.354	_DCVSN(de)GSIGCPVR_	6	2	868.443	-0.40542
>sp|P28300|LYOX_HUMAN Protein-lysine 6-oxidase OS=Homo sapiens GN=LOX PE=1 SV=2	81	1	71.3538	1	N	ITAVSGGKRSFSVYTNGSTVPSPVKDIGIST	141.34	71.354	_AVSSFDPEIDISN(de)QSGR_	7	2	835.917	0.24592
>sp|P01011|AACT_HUMAN Alpha-1-antichymotrypsin OS=Homo sapiens GN=SERPINA3 PE=1 SV=2;>sp|P01011-2|AACT_HUMAN Isoform 2 of Alpha-1-antichymotrypsin OS=Homo sapiens GN=SERPINA3	127;127	1	71.0796	1	N	EAEIHQSFQHIIRTINQSSDEIQISMGNAMF	85.909	149.52	_CVN(de)RNITEVPTDIPAYVR_	3	3	749.349	-0.074063
>sp|P05362|ICAM1_HUMAN Intercellular adhesion molecule 1 OS=Homo sapiens GN=ICAM1 PE=1 SV=2	145	1	70.9771	1	N	NITIRCQVEGGAPRANITVVIIRGEKEIKRE	95.273	70.977	_DCSCIPQN(de)ISSGFGHATAGK_	2	2	500.313	0.007025
>sp|P06756|ITAV_HUMAN Integrin alpha-V OS=Homo sapiens GN=ITGAV PE=1 SV=2;>sp|P06756-2|ITAV_HUMAN Isoform 2 of Integrin alpha-V OS=Homo sapiens GN=ITGAV;>sp|P06756-3|ITAV_HUMAN Isoform 3 of Integrin alpha-V OS=Homo sapiens GN=ITGAV	74;74;28	1	70.7831	1	N	SASSRMFIIVGAPKANTTQPGIVEGGQVIKC	100.19	70.783	_CQDGYYGFSKN(de)GCIPCQCN(de)NR_	2	2	806.931	0.61863
>sp|P11717|MPRI_HUMAN Cation-independent mannose-6-phosphate receptor OS=Homo sapiens GN=IGF2R PE=1 SV=3	2085	1	70.3351	1	N	DKVVVTYSKGYPCGGNKTASSVIEITCTKTV	125.75	70.335	_TVTISDHGTVTYN(de)GSICGDDQNGPK_	7	3	715.338	-0.59793
>sp|P29317|EPHA2_HUMAN Ephrin type-A receptor 2 OS=Homo sapiens GN=EPHA2 PE=1 SV=2	435	1	70.2596	1	N	GIVTSRSFRTASVSINQTEPPKVRIEGRSTT	147.56	70.26	_(ac)SFRDIRN(de)FTEMMR_	7	2	814.436	0.53838
>sp|P35613|BASI_HUMAN Basigin OS=Homo sapiens GN=BSG PE=1 SV=2;>sp|P35613-2|BASI_HUMAN Isoform 2 of Basigin OS=Homo sapiens GN=BSG	160;44	1	69.7289	1	N	TVEDIGSKIIITCSINDSATEVTGHRWIKGG	148.52	69.729	_DTVEFN(de)NHTICYNNFQK_	8	3	663.33	-0.41142
>sp|P13987|CD59_HUMAN CD59 glycoprotein OS=Homo sapiens GN=CD59 PE=1 SV=1	73	1	68.9194	1	N	GDSVIRSATRSIIEFNTTVSCDQQGTNHRVQ	125.73	68.919	_TVAQN(de)YSSVTHIHSIGK_	6	3	736.999	-0.40131
>sp|P11717|MPRI_HUMAN Cation-independent mannose-6-phosphate receptor OS=Homo sapiens GN=IGF2R PE=1 SV=3	747	1	68.598	1	N	DRDAGVGFPEYQEEDNSTYNFRWYTSYACPE	126.8	203.89	_SIIEFN(de)TTVSCDQQGTNHR_	14	2	1169.99	0.035962
>sp|P04156|PRIO_HUMAN Major prion protein OS=Homo sapiens GN=PRNP PE=1 SV=1;>sp|P04156-2|PRIO_HUMAN Isoform 2 of Major prion protein OS=Homo sapiens GN=PRNP	197;190	1	68.5765	1	N	ITIKQHTVTTTTKGENFTETDVKMMERVVEQ	93.623	68.576	_CIQAN(de)YSIMEN(de)GKIK_	12	4	535.262	-0.14558
>sp|P54289|CA2D1_HUMAN Voltage-dependent calcium channel subunit alpha-2/delta-1 OS=Homo sapiens GN=CACNA2D1 PE=1 SV=3;>sp|P54289-2|CA2D1_HUMAN Isoform 2 of Voltage-dependent calcium channel subunit alpha-2/delta-1 OS=Homo sapiens GN=CACNA2D1;>sp|P54289-3|CA2D1_HUMAN Isoform 3 of Voltage-dependent calcium channel subunit alpha-2/delta-1 OS=Homo sapiens GN=CACNA2D1;>sp|P54289-5|CA2D1_HUMAN Isoform…	781;769;764;762;757	1	68.5478	1	N	RSIDNDNYVFTAPYFNKSGPGAYESGIMVSK	164.65	98.281	_AFN(de)QTSHIIR_	15	2	954.936	0.48866
>sp|P54289|CA2D1_HUMAN Voltage-dependent calcium channel subunit alpha-2/delta-1 OS=Homo sapiens GN=CACNA2D1 PE=1 SV=3;>sp|P54289-2|CA2D1_HUMAN Isoform 2 of Voltage-dependent calcium channel subunit alpha-2/delta-1 OS=Homo sapiens GN=CACNA2D1;>sp|P54289-3|CA2D1_HUMAN Isoform 3 of Voltage-dependent calcium channel subunit alpha-2/delta-1 OS=Homo sapiens GN=CACNA2D1;>sp|P54289-5|CA2D1_HUMAN Isoform…	136;136;136;136;136	1	68.0444	1	N	EVVYYNAKDDIDPEKNDSEPGSQRIKPVFIE	163.51	68.044	_EQIN(de)ITIDHR_	8	3	601.594	-0.20113
>sp|Q10472|GALT1_HUMAN Polypeptide N-acetylgalactosaminyltransferase 1 OS=Homo sapiens GN=GALNT1 PE=1 SV=1	440	1	67.56	1	N	PRHYFSIGEIRNVETNQCIDNMARKENEKVG	178.67	148.52	_IIAPAYFIIGGN(de)QSGEGCVITR_	5	2	783.338	0.11844
>sp|P07998|RNAS1_HUMAN Ribonuclease pancreatic OS=Homo sapiens GN=RNASE1 PE=1 SV=4	116	1	67.1532	1	N	YKSNSSMHITDCRITNGSRYPNCAYRTSPKE	108.14	67.153	_IPCSQPPQIEHGTIN(de)SSR_	3	3	525.24	-0.14411
>sp|Q08334|I10R2_HUMAN Interleukin-10 receptor subunit beta OS=Homo sapiens GN=IL10RB PE=1 SV=2	68	1	67.1016	1	N	TAQYISYRIFQDKCMNTTITECDFSSISKYG	173.03	67.102	_IHVAGETDSSNIN(de)VSEPR_	3	3	632.267	-0.31216
>sp|Q15758|AAAT_HUMAN Neutral amino acid transporter B(0) OS=Homo sapiens GN=SLC1A5 PE=1 SV=2	212	1	66.9887	1	N	VSAAFRSYSTTYEERNITGTRVKVPVGQEVE	191.06	66.989	_IVTDWQN(de)YTR_	10	3	593.611	-0.61588
>sp|P05362|ICAM1_HUMAN Intercellular adhesion molecule 1 OS=Homo sapiens GN=ICAM1 PE=1 SV=2	145	1	66.5955	1	N	NITIRCQVEGGAPRANITVVIIRGEKEIKRE	98.281	66.595	_IGIYADVGN(de)K_	2	3	438.598	-0.14666
>sp|Q9HD45|TM9S3_HUMAN Transmembrane 9 superfamily member 3 OS=Homo sapiens GN=TM9SF3 PE=1 SV=2	174	1	66.5599	1	N	KKIEIGFNGNRIVDVNITSEGKVKIVPNTKI	240.46	66.56	_ISGN(de)ITIIR_	5	3	468.264	-0.15865
>sp|P42892|ECE1_HUMAN Endothelin-converting enzyme 1 OS=Homo sapiens GN=ECE1 PE=1 SV=2;>sp|P42892-4|ECE1_HUMAN Isoform D of Endothelin-converting enzyme 1 OS=Homo sapiens GN=ECE1;>sp|P42892-2|ECE1_HUMAN Isoform A of Endothelin-converting enzyme 1 OS=Homo sapiens GN=ECE1;>sp|P42892-3|ECE1_HUMAN Isoform C of Endothelin-converting enzyme 1 OS=Homo sapiens GN=ECE1	270;267;258;254	1	66.4943	1	N	VDQSGIGIPSRDYYINKTENEKVITGYINYM	158.11	187.85	_IN(de)ISTDDIPGIR_	5	2	709.328	0.7392
>sp|P00738|HPT_HUMAN Haptoglobin OS=Homo sapiens GN=HP PE=1 SV=1	241	1	66.2849	1	N	GKKQIVEIEKVVIHPNYSQVDIGIIKIKQKV	84.41	66.285	_IAFQN(de)MN(de)GSEYFVK_	6	3	599.337	-0.046053
>sp|Q08380|LG3BP_HUMAN Galectin-3-binding protein OS=Homo sapiens GN=LGALS3BP PE=1 SV=1	551	1	65.8417	1	N	DFEGWKAAIPSAIDTNSSKSTSSFPCPAGHF	174.59	65.842	_TPEQGSN(de)GTDGASQKTPSSTGPSPVFDIK_	10	3	425.886	0.13044
>sp|P07996|TSP1_HUMAN Thrombospondin-1 OS=Homo sapiens GN=THBS1 PE=1 SV=2;CON__Q28194	360;360	1	65.8078	1	N	VTICKKVSCPIMPCSNATVPDGECCPRCWPS	107.21	65.808	_AN(de)ISGGVWK_	10	3	803.332	-0.17126
>sp|P18084|ITB5_HUMAN Integrin beta-5 OS=Homo sapiens GN=ITGB5 PE=1 SV=1	531	1	65.4774	1	N	AEGKPICSGRGDCSCNQCSCFESEFGKIYGP	136.3	65.477	_ANIQFGDN(de)GTTISAVSNK_	6	2	1036.86	-0.44869
>sp|Q11206-4|SIA4C_HUMAN Isoform 4 of CMP-N-acetylneuraminate-beta-galactosamide-alpha-2,3-sialyltransferase 4 OS=Homo sapiens GN=ST3GAL4;>sp|Q11206|SIA4C_HUMAN CMP-N-acetylneuraminate-beta-galactosamide-alpha-2,3-sialyltransferase 4 OS=Homo sapiens GN=ST3GAL4 PE=2 SV=1;>sp|Q11206-2|SIA4C_HUMAN Isoform 2 of CMP-N-acetylneuraminate-beta-galactosamide-alpha-2,3-sialyltransferase 4 OS=Homo sapiens G…	316;310;309;306;305;299;295	1	65.3744	1	N	YYEQITIKSMAGSGHNVSQEAIAIKRMIEMG	180.09	65.374	_N(de)ITHIESIHIEDNAIK_	8	3	567.614	0.78247
>sp|O95084|PRS23_HUMAN Serine protease 23 OS=Homo sapiens GN=PRSS23 PE=1 SV=1	207	1	65.0384	1	N	VGFIKPKFKDGGRGANDSTSAMPEQMKFQWI	80.98	65.038	_ICIQVGSQCSTN(de)ESEKPSIIVEK_	3	2	734.308	0.99623
>sp|Q08380|LG3BP_HUMAN Galectin-3-binding protein OS=Homo sapiens GN=LGALS3BP PE=1 SV=1	192	1	64.5368	1	N	TANIEAQAIWKEPGSNVTMSVDAECVPMVRD	173.87	64.537	_GKPAN(de)ITDSISN(de)R_	5	3	693.645	-1.3181
>sp|P11117|PPAL_HUMAN Lysosomal acid phosphatase OS=Homo sapiens GN=ACP2 PE=1 SV=3;>sp|P11117-2|PPAL_HUMAN Isoform 2 of Lysosomal acid phosphatase OS=Homo sapiens GN=ACP2	133;133	1	64.4542	1	N	PWCFFPPSYPSYKIENISSSEMGYTATITRT	117.25	64.454	_M(ox)DGSINFN(de)R_	3	3	625.3	0.069748
>sp|Q8NBI5|S43A3_HUMAN Solute carrier family 43 member 3 OS=Homo sapiens GN=SLC43A3 PE=1 SV=2	56	1	64.4223	1	N	DYFKDICGPDAGPIGNATGQADCKAQDERFS	207.47	64.422	_VNCEERN(de)ITGIEN(de)FTIK_	12	3	873.047	-0.16674
>sp|Q8NC42|RN149_HUMAN E3 ubiquitin-protein ligase RNF149 OS=Homo sapiens GN=RNF149 PE=2 SV=2	131	1	64.043	1	N	NFRIWNFTMNAKIISNISCNVKGNVVDWQND	204.85	152.54	_TFAN(de)GSIAFR_	4	2	574.803	0.40441
>sp|P08581-2|MET_HUMAN Isoform 2 of Hepatocyte growth factor receptor OS=Homo sapiens GN=MET;>sp|P08581|MET_HUMAN Hepatocyte growth factor receptor OS=Homo sapiens GN=MET PE=1 SV=4;>sp|P08581-3|MET_HUMAN Isoform 3 of Hepatocyte growth factor receptor OS=Homo sapiens GN=MET	106;106;106	1	63.9787	1	N	EHPDCFPCQDCSSKANISGGVWKDNINMAIV	110.53	63.979	_IVGGPVAGGDPN(de)QTIR_	21	4	787.605	-0.414
>sp|P14384|CBPM_HUMAN Carboxypeptidase M OS=Homo sapiens GN=CPM PE=1 SV=2	38	1	63.6823	1	N	HRQEGMEAFIKTVAQNYSSVTHIHSIGKSVK	129.34	63.682	_AFN(de)STIPTMAQMEK_	5	4	461.489	0.45603
>sp|Q9BY67-3|CADM1_HUMAN Isoform 3 of Cell adhesion molecule 1 OS=Homo sapiens GN=CADM1;>sp|Q9BY67-4|CADM1_HUMAN Isoform 4 of Cell adhesion molecule 1 OS=Homo sapiens GN=CADM1;>sp|Q9BY67|CADM1_HUMAN Cell adhesion molecule 1 OS=Homo sapiens GN=CADM1 PE=1 SV=2;>sp|Q9BY67-5|CADM1_HUMAN Isoform 5 of Cell adhesion molecule 1 OS=Homo sapiens GN=CADM1;>sp|Q9BY67-2|CADM1_HUMAN Isoform 2 of Cell adhesion …	165;165;165;165;165	1	63.1836	1	N	DIQKDTAVEGEEIEVNCTAMASKPATTIRWF	234.82	63.184	_N(de)ITNVIGTQSR_	12	3	898.758	0.58614
>sp|O75144-2|ICOSL_HUMAN Isoform 2 of ICOS ligand OS=Homo sapiens GN=ICOSLG;>sp|O75144|ICOSL_HUMAN ICOS ligand OS=Homo sapiens GN=ICOSLG PE=1 SV=2	102;102	1	63.0912	1	N	GINASSMAWARIHRINASIADIQSQIRSPIG	72.705	63.091	_DN(de)SSGTFIVIIR_	2	3	477.26	-0.036526
>sp|P07998|RNAS1_HUMAN Ribonuclease pancreatic OS=Homo sapiens GN=RNASE1 PE=1 SV=4	104	1	62.3624	1	N	EKVTCKNGQGNCYKSNSSMHITDCRITNGSR	107.98	62.362	_ISEEN(de)ETTCYMGK_	14	4	684.783	-0.76625
>sp|O95084|PRS23_HUMAN Serine protease 23 OS=Homo sapiens GN=PRSS23 PE=1 SV=1	207	1	62.3571	1	N	VGFIKPKFKDGGRGANDSTSAMPEQMKFQWI	80.98	62.357	_SVNPN(de)DTCIASCVK_	3	2	734.308	0.70789
>sp|P05090|APOD_HUMAN Apolipoprotein D OS=Homo sapiens GN=APOD PE=1 SV=1	65	1	62.1618	1	N	EKIPTTFENGRCIQANYSIMENGKIKVINQE	92.265	62.162	_AN(de)ITVVIIRGEK_	5	3	590.952	-0.23475
>sp|Q9Y2B1|TMEM5_HUMAN Transmembrane protein 5 OS=Homo sapiens GN=TMEM5 PE=1 SV=1	312	1	62.0879	1	N	ICWVSAREHWQPQETNESIKNYQDAIIQSDI	296.73	62.088	_NEGPVDN(de)QFGTK_	9	3	542.918	0.35736
>sp|Q96AY3|FKB10_HUMAN Peptidyl-prolyl cis-trans isomerase FKBP10 OS=Homo sapiens GN=FKBP10 PE=1 SV=1	393	1	61.3753	1	N	DVVEIRTISRPSETCNETTKIGDFVRYHYNC	223.39	61.375	_IATIAN(de)FSAIGIEPGR_	10	3	542.254	-0.42894
>sp|P07998|RNAS1_HUMAN Ribonuclease pancreatic OS=Homo sapiens GN=RNASE1 PE=1 SV=4	104	1	61.1808	1	N	EKVTCKNGQGNCYKSNSSMHITDCRITNGSR	107.65	61.181	_FEEPSCPSN(de)WTWVEGSGR_	14	4	680.785	-0.41923
>sp|P21589|5NTD_HUMAN 5'-nucleotidase OS=Homo sapiens GN=NT5E PE=1 SV=1;>sp|P21589-2|5NTD_HUMAN Isoform 2 of 5'-nucleotidase OS=Homo sapiens GN=NT5E	333	1	61.1674	1	N	PSIKADINKWRIKIDNYSTQEIGKTIVYIDG	140.31	61.167	_N(de)CTITANAECACR_	5	2	755.393	0.12865
>sp|P15848|ARSB_HUMAN Arylsulfatase B OS=Homo sapiens GN=ARSB PE=1 SV=1;>sp|P15848-2|ARSB_HUMAN Isoform 2 of Arylsulfatase B OS=Homo sapiens GN=ARSB	188	1	60.6282	1	N	EDYYSHERCTIIDAINVTRCAIDFRDGEEVA	133.12	60.628	_IQITWIENGN(de)VSR_	8	2	638.832	-1.0619
>sp|P15328|FOLR1_HUMAN Folate receptor alpha OS=Homo sapiens GN=FOLR1 PE=1 SV=3	69	1	60.307	1	N	HEQCRPWRKNACCSTNTSQEAHKDVSYIYRF	130.66	60.307	_GICVN(de)ASAVSR_	7	3	836.025	-0.15942
>sp|P78324-2|SHPS1_HUMAN Isoform 2 of Tyrosine-protein phosphatase non-receptor type substrate 1 OS=Homo sapiens GN=SIRPA;>sp|P78324|SHPS1_HUMAN Tyrosine-protein phosphatase non-receptor type substrate 1 OS=Homo sapiens GN=SIRPA PE=1 SV=2;>sp|P78324-4|SHPS1_HUMAN Isoform 4 of Tyrosine-protein phosphatase non-receptor type substrate 1 OS=Homo sapiens GN=SIRPA;>sp|Q5TFQ8|SIRBL_HUMAN Signal-regulato…	292	0.999999	60.003	1	N	RKGFDCGIEAKNIGFNCTTSQGKVAIGSIFH	162.29	112.5	_VYVYAIN(de)QTR_	5	2	664.301	0.643
